# Supplementary material for: Reference MP2/CBS and CCSD(T) quantum-chemical calculations on stacked adenine dimers. Comparison with DFT-D, MP2.5, SCS(MI)-MP2, M06-2X, CBS(SCS-D) and force field descriptions
Source: Royal Society of Chemistry journal article supplement (doi:10.1039/b924461a), 2010-01-01
Supplement: b924461a_xyz.odt [file b924461a_xyz.odt]

Cartesian coordinates of the parallel dimers.

30
adenine dimer 1
 N  0.095673  2.588361  0.000000
 C  0.460844  1.288246  0.000000
 N  1.759578  0.972543  0.000000
 C  2.107363  -0.329661  0.000000
 N  1.316357  -1.404115  0.000000
 C  0.027299  -1.048489  0.000000
 C  -0.486565  0.249767  0.000000
 N  -1.862783  0.255430  0.000000
 C  -2.176005  -1.030205  0.000000
 N  -1.085124  -1.855826  0.000000
 H  3.172571  -0.522367  0.000000
 H  -3.181128  -1.419331  0.000000
 H  -1.085122  -2.863359  0.000000
 H  0.807093  3.296715  0.000000
 H  -0.876946  2.835639  0.000000
 N  0.095673  2.588361  2.900000
 C  0.460844  1.288246  2.900000
 N  1.759578  0.972543  2.900000
 C  2.107363  -0.329661  2.900000
 N  1.316357  -1.404115  2.900000
 C  0.027299  -1.048489  2.900000
 C  -0.486565  0.249767  2.900000
 N  -1.862783  0.255430  2.900000
 C  -2.176005  -1.030205  2.900000
 N  -1.085124  -1.855826  2.900000
 H  3.172571  -0.522367  2.900000
 H  -3.181128  -1.419331  2.900000
 H  -1.085122  -2.863359  2.900000
 H  0.807093  3.296715  2.900000
 H  -0.876946  2.835639  2.900000
30
adenine dimer 2
 N  0.095673  2.588361  0.000000
 C  0.460844  1.288246  0.000000
 N  1.759578  0.972543  0.000000
 C  2.107363  -0.329661  0.000000
 N  1.316357  -1.404115  0.000000
 C  0.027299  -1.048489  0.000000
 C  -0.486565  0.249767  0.000000
 N  -1.862783  0.255430  0.000000
 C  -2.176005  -1.030205  0.000000
 N  -1.085124  -1.855826  0.000000
 H  3.172571  -0.522367  0.000000
 H  -3.181128  -1.419331  0.000000
 H  -1.085122  -2.863359  0.000000
 H  0.807093  3.296715  0.000000
 H  -0.876946  2.835639  0.000000
 N  0.095673  2.588361  3.000000
 C  0.460844  1.288246  3.000000
 N  1.759578  0.972543  3.000000
 C  2.107363  -0.329661  3.000000
 N  1.316357  -1.404115  3.000000
 C  0.027299  -1.048489  3.000000
 C  -0.486565  0.249767  3.000000
 N  -1.862783  0.255430  3.000000
 C  -2.176005  -1.030205  3.000000
 N  -1.085124  -1.855826  3.000000
 H  3.172571  -0.522367  3.000000
 H  -3.181128  -1.419331  3.000000
 H  -1.085122  -2.863359  3.000000
 H  0.807093  3.296715  3.000000
 H  -0.876946  2.835639  3.000000
30
adenine dimer 3
 N  0.095673  2.588361  0.000000
 C  0.460844  1.288246  0.000000
 N  1.759578  0.972543  0.000000
 C  2.107363  -0.329661  0.000000
 N  1.316357  -1.404115  0.000000
 C  0.027299  -1.048489  0.000000
 C  -0.486565  0.249767  0.000000
 N  -1.862783  0.255430  0.000000
 C  -2.176005  -1.030205  0.000000
 N  -1.085124  -1.855826  0.000000
 H  3.172571  -0.522367  0.000000
 H  -3.181128  -1.419331  0.000000
 H  -1.085122  -2.863359  0.000000
 H  0.807093  3.296715  0.000000
 H  -0.876946  2.835639  0.000000
 N  0.095673  2.588361  3.100000
 C  0.460844  1.288246  3.100000
 N  1.759578  0.972543  3.100000
 C  2.107363  -0.329661  3.100000
 N  1.316357  -1.404115  3.100000
 C  0.027299  -1.048489  3.100000
 C  -0.486565  0.249767  3.100000
 N  -1.862783  0.255430  3.100000
 C  -2.176005  -1.030205  3.100000
 N  -1.085124  -1.855826  3.100000
 H  3.172571  -0.522367  3.100000
 H  -3.181128  -1.419331  3.100000
 H  -1.085122  -2.863359  3.100000
 H  0.807093  3.296715  3.100000
 H  -0.876946  2.835639  3.100000
30
adenine dimer 4
 N  0.095673  2.588361  0.000000
 C  0.460844  1.288246  0.000000
 N  1.759578  0.972543  0.000000
 C  2.107363  -0.329661  0.000000
 N  1.316357  -1.404115  0.000000
 C  0.027299  -1.048489  0.000000
 C  -0.486565  0.249767  0.000000
 N  -1.862783  0.255430  0.000000
 C  -2.176005  -1.030205  0.000000
 N  -1.085124  -1.855826  0.000000
 H  3.172571  -0.522367  0.000000
 H  -3.181128  -1.419331  0.000000
 H  -1.085122  -2.863359  0.000000
 H  0.807093  3.296715  0.000000
 H  -0.876946  2.835639  0.000000
 N  0.095673  2.588361  3.200000
 C  0.460844  1.288246  3.200000
 N  1.759578  0.972543  3.200000
 C  2.107363  -0.329661  3.200000
 N  1.316357  -1.404115  3.200000
 C  0.027299  -1.048489  3.200000
 C  -0.486565  0.249767  3.200000
 N  -1.862783  0.255430  3.200000
 C  -2.176005  -1.030205  3.200000
 N  -1.085124  -1.855826  3.200000
 H  3.172571  -0.522367  3.200000
 H  -3.181128  -1.419331  3.200000
 H  -1.085122  -2.863359  3.200000
 H  0.807093  3.296715  3.200000
 H  -0.876946  2.835639  3.200000
30
adenine dimer 5
 N  0.095673  2.588361  0.000000
 C  0.460844  1.288246  0.000000
 N  1.759578  0.972543  0.000000
 C  2.107363  -0.329661  0.000000
 N  1.316357  -1.404115  0.000000
 C  0.027299  -1.048489  0.000000
 C  -0.486565  0.249767  0.000000
 N  -1.862783  0.255430  0.000000
 C  -2.176005  -1.030205  0.000000
 N  -1.085124  -1.855826  0.000000
 H  3.172571  -0.522367  0.000000
 H  -3.181128  -1.419331  0.000000
 H  -1.085122  -2.863359  0.000000
 H  0.807093  3.296715  0.000000
 H  -0.876946  2.835639  0.000000
 N  0.095673  2.588361  3.299999
 C  0.460844  1.288246  3.299999
 N  1.759578  0.972543  3.299999
 C  2.107363  -0.329661  3.299999
 N  1.316357  -1.404115  3.299999
 C  0.027299  -1.048489  3.299999
 C  -0.486565  0.249767  3.299999
 N  -1.862783  0.255430  3.299999
 C  -2.176005  -1.030205  3.299999
 N  -1.085124  -1.855826  3.299999
 H  3.172571  -0.522367  3.299999
 H  -3.181128  -1.419331  3.299999
 H  -1.085122  -2.863359  3.299999
 H  0.807093  3.296715  3.299999
 H  -0.876946  2.835639  3.299999
30
adenine dimer 6
 N  0.095673  2.588361  0.000000
 C  0.460844  1.288246  0.000000
 N  1.759578  0.972543  0.000000
 C  2.107363  -0.329661  0.000000
 N  1.316357  -1.404115  0.000000
 C  0.027299  -1.048489  0.000000
 C  -0.486565  0.249767  0.000000
 N  -1.862783  0.255430  0.000000
 C  -2.176005  -1.030205  0.000000
 N  -1.085124  -1.855826  0.000000
 H  3.172571  -0.522367  0.000000
 H  -3.181128  -1.419331  0.000000
 H  -1.085122  -2.863359  0.000000
 H  0.807093  3.296715  0.000000
 H  -0.876946  2.835639  0.000000
 N  0.095673  2.588361  3.399999
 C  0.460844  1.288246  3.399999
 N  1.759578  0.972543  3.399999
 C  2.107363  -0.329661  3.399999
 N  1.316357  -1.404115  3.399999
 C  0.027299  -1.048489  3.399999
 C  -0.486565  0.249767  3.399999
 N  -1.862783  0.255430  3.399999
 C  -2.176005  -1.030205  3.399999
 N  -1.085124  -1.855826  3.399999
 H  3.172571  -0.522367  3.399999
 H  -3.181128  -1.419331  3.399999
 H  -1.085122  -2.863359  3.399999
 H  0.807093  3.296715  3.399999
 H  -0.876946  2.835639  3.399999
30
adenine dimer 7
 N  0.095673  2.588361  0.000000
 C  0.460844  1.288246  0.000000
 N  1.759578  0.972543  0.000000
 C  2.107363  -0.329661  0.000000
 N  1.316357  -1.404115  0.000000
 C  0.027299  -1.048489  0.000000
 C  -0.486565  0.249767  0.000000
 N  -1.862783  0.255430  0.000000
 C  -2.176005  -1.030205  0.000000
 N  -1.085124  -1.855826  0.000000
 H  3.172571  -0.522367  0.000000
 H  -3.181128  -1.419331  0.000000
 H  -1.085122  -2.863359  0.000000
 H  0.807093  3.296715  0.000000
 H  -0.876946  2.835639  0.000000
 N  0.095673  2.588361  3.499999
 C  0.460844  1.288246  3.499999
 N  1.759578  0.972543  3.499999
 C  2.107363  -0.329661  3.499999
 N  1.316357  -1.404115  3.499999
 C  0.027299  -1.048489  3.499999
 C  -0.486565  0.249767  3.499999
 N  -1.862783  0.255430  3.499999
 C  -2.176005  -1.030205  3.499999
 N  -1.085124  -1.855826  3.499999
 H  3.172571  -0.522367  3.499999
 H  -3.181128  -1.419331  3.499999
 H  -1.085122  -2.863359  3.499999
 H  0.807093  3.296715  3.499999
 H  -0.876946  2.835639  3.499999
30
adenine dimer 8
 N  0.095673  2.588361  0.000000
 C  0.460844  1.288246  0.000000
 N  1.759578  0.972543  0.000000
 C  2.107363  -0.329661  0.000000
 N  1.316357  -1.404115  0.000000
 C  0.027299  -1.048489  0.000000
 C  -0.486565  0.249767  0.000000
 N  -1.862783  0.255430  0.000000
 C  -2.176005  -1.030205  0.000000
 N  -1.085124  -1.855826  0.000000
 H  3.172571  -0.522367  0.000000
 H  -3.181128  -1.419331  0.000000
 H  -1.085122  -2.863359  0.000000
 H  0.807093  3.296715  0.000000
 H  -0.876946  2.835639  0.000000
 N  0.095673  2.588361  3.599999
 C  0.460844  1.288246  3.599999
 N  1.759578  0.972543  3.599999
 C  2.107363  -0.329661  3.599999
 N  1.316357  -1.404115  3.599999
 C  0.027299  -1.048489  3.599999
 C  -0.486565  0.249767  3.599999
 N  -1.862783  0.255430  3.599999
 C  -2.176005  -1.030205  3.599999
 N  -1.085124  -1.855826  3.599999
 H  3.172571  -0.522367  3.599999
 H  -3.181128  -1.419331  3.599999
 H  -1.085122  -2.863359  3.599999
 H  0.807093  3.296715  3.599999
 H  -0.876946  2.835639  3.599999
30
adenine dimer 9
 N  0.095673  2.588361  0.000000
 C  0.460844  1.288246  0.000000
 N  1.759578  0.972543  0.000000
 C  2.107363  -0.329661  0.000000
 N  1.316357  -1.404115  0.000000
 C  0.027299  -1.048489  0.000000
 C  -0.486565  0.249767  0.000000
 N  -1.862783  0.255430  0.000000
 C  -2.176005  -1.030205  0.000000
 N  -1.085124  -1.855826  0.000000
 H  3.172571  -0.522367  0.000000
 H  -3.181128  -1.419331  0.000000
 H  -1.085122  -2.863359  0.000000
 H  0.807093  3.296715  0.000000
 H  -0.876946  2.835639  0.000000
 N  0.095673  2.588361  3.699999
 C  0.460844  1.288246  3.699999
 N  1.759578  0.972543  3.699999
 C  2.107363  -0.329661  3.699999
 N  1.316357  -1.404115  3.699999
 C  0.027299  -1.048489  3.699999
 C  -0.486565  0.249767  3.699999
 N  -1.862783  0.255430  3.699999
 C  -2.176005  -1.030205  3.699999
 N  -1.085124  -1.855826  3.699999
 H  3.172571  -0.522367  3.699999
 H  -3.181128  -1.419331  3.699999
 H  -1.085122  -2.863359  3.699999
 H  0.807093  3.296715  3.699999
 H  -0.876946  2.835639  3.699999
30
adenine dimer 10
 N  0.095673  2.588361  0.000000
 C  0.460844  1.288246  0.000000
 N  1.759578  0.972543  0.000000
 C  2.107363  -0.329661  0.000000
 N  1.316357  -1.404115  0.000000
 C  0.027299  -1.048489  0.000000
 C  -0.486565  0.249767  0.000000
 N  -1.862783  0.255430  0.000000
 C  -2.176005  -1.030205  0.000000
 N  -1.085124  -1.855826  0.000000
 H  3.172571  -0.522367  0.000000
 H  -3.181128  -1.419331  0.000000
 H  -1.085122  -2.863359  0.000000
 H  0.807093  3.296715  0.000000
 H  -0.876946  2.835639  0.000000
 N  0.095673  2.588361  3.799999
 C  0.460844  1.288246  3.799999
 N  1.759578  0.972543  3.799999
 C  2.107363  -0.329661  3.799999
 N  1.316357  -1.404115  3.799999
 C  0.027299  -1.048489  3.799999
 C  -0.486565  0.249767  3.799999
 N  -1.862783  0.255430  3.799999
 C  -2.176005  -1.030205  3.799999
 N  -1.085124  -1.855826  3.799999
 H  3.172571  -0.522367  3.799999
 H  -3.181128  -1.419331  3.799999
 H  -1.085122  -2.863359  3.799999
 H  0.807093  3.296715  3.799999
 H  -0.876946  2.835639  3.799999
30
adenine dimer 11
 N  0.095673  2.588361  0.000000
 C  0.460844  1.288246  0.000000
 N  1.759578  0.972543  0.000000
 C  2.107363  -0.329661  0.000000
 N  1.316357  -1.404115  0.000000
 C  0.027299  -1.048489  0.000000
 C  -0.486565  0.249767  0.000000
 N  -1.862783  0.255430  0.000000
 C  -2.176005  -1.030205  0.000000
 N  -1.085124  -1.855826  0.000000
 H  3.172571  -0.522367  0.000000
 H  -3.181128  -1.419331  0.000000
 H  -1.085122  -2.863359  0.000000
 H  0.807093  3.296715  0.000000
 H  -0.876946  2.835639  0.000000
 N  0.095673  2.588361  3.899999
 C  0.460844  1.288246  3.899999
 N  1.759578  0.972543  3.899999
 C  2.107363  -0.329661  3.899999
 N  1.316357  -1.404115  3.899999
 C  0.027299  -1.048489  3.899999
 C  -0.486565  0.249767  3.899999
 N  -1.862783  0.255430  3.899999
 C  -2.176005  -1.030205  3.899999
 N  -1.085124  -1.855826  3.899999
 H  3.172571  -0.522367  3.899999
 H  -3.181128  -1.419331  3.899999
 H  -1.085122  -2.863359  3.899999
 H  0.807093  3.296715  3.899999
 H  -0.876946  2.835639  3.899999
30
adenine dimer 12
 N  0.095673  2.588361  0.000000
 C  0.460844  1.288246  0.000000
 N  1.759578  0.972543  0.000000
 C  2.107363  -0.329661  0.000000
 N  1.316357  -1.404115  0.000000
 C  0.027299  -1.048489  0.000000
 C  -0.486565  0.249767  0.000000
 N  -1.862783  0.255430  0.000000
 C  -2.176005  -1.030205  0.000000
 N  -1.085124  -1.855826  0.000000
 H  3.172571  -0.522367  0.000000
 H  -3.181128  -1.419331  0.000000
 H  -1.085122  -2.863359  0.000000
 H  0.807093  3.296715  0.000000
 H  -0.876946  2.835639  0.000000
 N  0.095673  2.588361  3.999999
 C  0.460844  1.288246  3.999999
 N  1.759578  0.972543  3.999999
 C  2.107363  -0.329661  3.999999
 N  1.316357  -1.404115  3.999999
 C  0.027299  -1.048489  3.999999
 C  -0.486565  0.249767  3.999999
 N  -1.862783  0.255430  3.999999
 C  -2.176005  -1.030205  3.999999
 N  -1.085124  -1.855826  3.999999
 H  3.172571  -0.522367  3.999999
 H  -3.181128  -1.419331  3.999999
 H  -1.085122  -2.863359  3.999999
 H  0.807093  3.296715  3.999999
 H  -0.876946  2.835639  3.999999
30
adenine dimer 13
 N  0.095673  2.588361  0.000000
 C  0.460844  1.288246  0.000000
 N  1.759578  0.972543  0.000000
 C  2.107363  -0.329661  0.000000
 N  1.316357  -1.404115  0.000000
 C  0.027299  -1.048489  0.000000
 C  -0.486565  0.249767  0.000000
 N  -1.862783  0.255430  0.000000
 C  -2.176005  -1.030205  0.000000
 N  -1.085124  -1.855826  0.000000
 H  3.172571  -0.522367  0.000000
 H  -3.181128  -1.419331  0.000000
 H  -1.085122  -2.863359  0.000000
 H  0.807093  3.296715  0.000000
 H  -0.876946  2.835639  0.000000
 N  1.595672  2.588361  2.900000
 C  1.960844  1.288246  2.900000
 N  3.259578  0.972543  2.900000
 C  3.607363  -0.329661  2.900000
 N  2.816357  -1.404115  2.900000
 C  1.527299  -1.048489  2.900000
 C  1.013435  0.249767  2.900000
 N  -0.362783  0.255430  2.900000
 C  -0.676005  -1.030205  2.900000
 N  0.414876  -1.855826  2.900000
 H  4.672571  -0.522367  2.900000
 H  -1.681128  -1.419331  2.900000
 H  0.414878  -2.863359  2.900000
 H  2.307093  3.296715  2.900000
 H  0.623054  2.835639  2.900000
30
adenine dimer 14
 N  0.095673  2.588361  0.000000
 C  0.460844  1.288246  0.000000
 N  1.759578  0.972543  0.000000
 C  2.107363  -0.329661  0.000000
 N  1.316357  -1.404115  0.000000
 C  0.027299  -1.048489  0.000000
 C  -0.486565  0.249767  0.000000
 N  -1.862783  0.255430  0.000000
 C  -2.176005  -1.030205  0.000000
 N  -1.085124  -1.855826  0.000000
 H  3.172571  -0.522367  0.000000
 H  -3.181128  -1.419331  0.000000
 H  -1.085122  -2.863359  0.000000
 H  0.807093  3.296715  0.000000
 H  -0.876946  2.835639  0.000000
 N  1.595672  2.588361  3.000000
 C  1.960844  1.288246  3.000000
 N  3.259578  0.972543  3.000000
 C  3.607363  -0.329661  3.000000
 N  2.816357  -1.404115  3.000000
 C  1.527299  -1.048489  3.000000
 C  1.013435  0.249767  3.000000
 N  -0.362783  0.255430  3.000000
 C  -0.676005  -1.030205  3.000000
 N  0.414876  -1.855826  3.000000
 H  4.672571  -0.522367  3.000000
 H  -1.681128  -1.419331  3.000000
 H  0.414878  -2.863359  3.000000
 H  2.307093  3.296715  3.000000
 H  0.623054  2.835639  3.000000
30
adenine dimer 15
 N  0.095673  2.588361  0.000000
 C  0.460844  1.288246  0.000000
 N  1.759578  0.972543  0.000000
 C  2.107363  -0.329661  0.000000
 N  1.316357  -1.404115  0.000000
 C  0.027299  -1.048489  0.000000
 C  -0.486565  0.249767  0.000000
 N  -1.862783  0.255430  0.000000
 C  -2.176005  -1.030205  0.000000
 N  -1.085124  -1.855826  0.000000
 H  3.172571  -0.522367  0.000000
 H  -3.181128  -1.419331  0.000000
 H  -1.085122  -2.863359  0.000000
 H  0.807093  3.296715  0.000000
 H  -0.876946  2.835639  0.000000
 N  1.595672  2.588361  3.100000
 C  1.960844  1.288246  3.100000
 N  3.259578  0.972543  3.100000
 C  3.607363  -0.329661  3.100000
 N  2.816357  -1.404115  3.100000
 C  1.527299  -1.048489  3.100000
 C  1.013435  0.249767  3.100000
 N  -0.362783  0.255430  3.100000
 C  -0.676005  -1.030205  3.100000
 N  0.414876  -1.855826  3.100000
 H  4.672571  -0.522367  3.100000
 H  -1.681128  -1.419331  3.100000
 H  0.414878  -2.863359  3.100000
 H  2.307093  3.296715  3.100000
 H  0.623054  2.835639  3.100000
30
adenine dimer 16
 N  0.095673  2.588361  0.000000
 C  0.460844  1.288246  0.000000
 N  1.759578  0.972543  0.000000
 C  2.107363  -0.329661  0.000000
 N  1.316357  -1.404115  0.000000
 C  0.027299  -1.048489  0.000000
 C  -0.486565  0.249767  0.000000
 N  -1.862783  0.255430  0.000000
 C  -2.176005  -1.030205  0.000000
 N  -1.085124  -1.855826  0.000000
 H  3.172571  -0.522367  0.000000
 H  -3.181128  -1.419331  0.000000
 H  -1.085122  -2.863359  0.000000
 H  0.807093  3.296715  0.000000
 H  -0.876946  2.835639  0.000000
 N  1.595672  2.588361  3.200000
 C  1.960844  1.288246  3.200000
 N  3.259578  0.972543  3.200000
 C  3.607363  -0.329661  3.200000
 N  2.816357  -1.404115  3.200000
 C  1.527299  -1.048489  3.200000
 C  1.013435  0.249767  3.200000
 N  -0.362783  0.255430  3.200000
 C  -0.676005  -1.030205  3.200000
 N  0.414876  -1.855826  3.200000
 H  4.672571  -0.522367  3.200000
 H  -1.681128  -1.419331  3.200000
 H  0.414878  -2.863359  3.200000
 H  2.307093  3.296715  3.200000
 H  0.623054  2.835639  3.200000
30
adenine dimer 17
 N  0.095673  2.588361  0.000000
 C  0.460844  1.288246  0.000000
 N  1.759578  0.972543  0.000000
 C  2.107363  -0.329661  0.000000
 N  1.316357  -1.404115  0.000000
 C  0.027299  -1.048489  0.000000
 C  -0.486565  0.249767  0.000000
 N  -1.862783  0.255430  0.000000
 C  -2.176005  -1.030205  0.000000
 N  -1.085124  -1.855826  0.000000
 H  3.172571  -0.522367  0.000000
 H  -3.181128  -1.419331  0.000000
 H  -1.085122  -2.863359  0.000000
 H  0.807093  3.296715  0.000000
 H  -0.876946  2.835639  0.000000
 N  1.595672  2.588361  3.299999
 C  1.960844  1.288246  3.299999
 N  3.259578  0.972543  3.299999
 C  3.607363  -0.329661  3.299999
 N  2.816357  -1.404115  3.299999
 C  1.527299  -1.048489  3.299999
 C  1.013435  0.249767  3.299999
 N  -0.362783  0.255430  3.299999
 C  -0.676005  -1.030205  3.299999
 N  0.414876  -1.855826  3.299999
 H  4.672571  -0.522367  3.299999
 H  -1.681128  -1.419331  3.299999
 H  0.414878  -2.863359  3.299999
 H  2.307093  3.296715  3.299999
 H  0.623054  2.835639  3.299999
30
adenine dimer 18
 N  0.095673  2.588361  0.000000
 C  0.460844  1.288246  0.000000
 N  1.759578  0.972543  0.000000
 C  2.107363  -0.329661  0.000000
 N  1.316357  -1.404115  0.000000
 C  0.027299  -1.048489  0.000000
 C  -0.486565  0.249767  0.000000
 N  -1.862783  0.255430  0.000000
 C  -2.176005  -1.030205  0.000000
 N  -1.085124  -1.855826  0.000000
 H  3.172571  -0.522367  0.000000
 H  -3.181128  -1.419331  0.000000
 H  -1.085122  -2.863359  0.000000
 H  0.807093  3.296715  0.000000
 H  -0.876946  2.835639  0.000000
 N  1.595672  2.588361  3.399999
 C  1.960844  1.288246  3.399999
 N  3.259578  0.972543  3.399999
 C  3.607363  -0.329661  3.399999
 N  2.816357  -1.404115  3.399999
 C  1.527299  -1.048489  3.399999
 C  1.013435  0.249767  3.399999
 N  -0.362783  0.255430  3.399999
 C  -0.676005  -1.030205  3.399999
 N  0.414876  -1.855826  3.399999
 H  4.672571  -0.522367  3.399999
 H  -1.681128  -1.419331  3.399999
 H  0.414878  -2.863359  3.399999
 H  2.307093  3.296715  3.399999
 H  0.623054  2.835639  3.399999
30
adenine dimer 19
 N  0.095673  2.588361  0.000000
 C  0.460844  1.288246  0.000000
 N  1.759578  0.972543  0.000000
 C  2.107363  -0.329661  0.000000
 N  1.316357  -1.404115  0.000000
 C  0.027299  -1.048489  0.000000
 C  -0.486565  0.249767  0.000000
 N  -1.862783  0.255430  0.000000
 C  -2.176005  -1.030205  0.000000
 N  -1.085124  -1.855826  0.000000
 H  3.172571  -0.522367  0.000000
 H  -3.181128  -1.419331  0.000000
 H  -1.085122  -2.863359  0.000000
 H  0.807093  3.296715  0.000000
 H  -0.876946  2.835639  0.000000
 N  1.595672  2.588361  3.499999
 C  1.960844  1.288246  3.499999
 N  3.259578  0.972543  3.499999
 C  3.607363  -0.329661  3.499999
 N  2.816357  -1.404115  3.499999
 C  1.527299  -1.048489  3.499999
 C  1.013435  0.249767  3.499999
 N  -0.362783  0.255430  3.499999
 C  -0.676005  -1.030205  3.499999
 N  0.414876  -1.855826  3.499999
 H  4.672571  -0.522367  3.499999
 H  -1.681128  -1.419331  3.499999
 H  0.414878  -2.863359  3.499999
 H  2.307093  3.296715  3.499999
 H  0.623054  2.835639  3.499999
30
adenine dimer 20
 N  0.095673  2.588361  0.000000
 C  0.460844  1.288246  0.000000
 N  1.759578  0.972543  0.000000
 C  2.107363  -0.329661  0.000000
 N  1.316357  -1.404115  0.000000
 C  0.027299  -1.048489  0.000000
 C  -0.486565  0.249767  0.000000
 N  -1.862783  0.255430  0.000000
 C  -2.176005  -1.030205  0.000000
 N  -1.085124  -1.855826  0.000000
 H  3.172571  -0.522367  0.000000
 H  -3.181128  -1.419331  0.000000
 H  -1.085122  -2.863359  0.000000
 H  0.807093  3.296715  0.000000
 H  -0.876946  2.835639  0.000000
 N  1.595672  2.588361  3.599999
 C  1.960844  1.288246  3.599999
 N  3.259578  0.972543  3.599999
 C  3.607363  -0.329661  3.599999
 N  2.816357  -1.404115  3.599999
 C  1.527299  -1.048489  3.599999
 C  1.013435  0.249767  3.599999
 N  -0.362783  0.255430  3.599999
 C  -0.676005  -1.030205  3.599999
 N  0.414876  -1.855826  3.599999
 H  4.672571  -0.522367  3.599999
 H  -1.681128  -1.419331  3.599999
 H  0.414878  -2.863359  3.599999
 H  2.307093  3.296715  3.599999
 H  0.623054  2.835639  3.599999
30
adenine dimer 21
 N  0.095673  2.588361  0.000000
 C  0.460844  1.288246  0.000000
 N  1.759578  0.972543  0.000000
 C  2.107363  -0.329661  0.000000
 N  1.316357  -1.404115  0.000000
 C  0.027299  -1.048489  0.000000
 C  -0.486565  0.249767  0.000000
 N  -1.862783  0.255430  0.000000
 C  -2.176005  -1.030205  0.000000
 N  -1.085124  -1.855826  0.000000
 H  3.172571  -0.522367  0.000000
 H  -3.181128  -1.419331  0.000000
 H  -1.085122  -2.863359  0.000000
 H  0.807093  3.296715  0.000000
 H  -0.876946  2.835639  0.000000
 N  1.595672  2.588361  3.699999
 C  1.960844  1.288246  3.699999
 N  3.259578  0.972543  3.699999
 C  3.607363  -0.329661  3.699999
 N  2.816357  -1.404115  3.699999
 C  1.527299  -1.048489  3.699999
 C  1.013435  0.249767  3.699999
 N  -0.362783  0.255430  3.699999
 C  -0.676005  -1.030205  3.699999
 N  0.414876  -1.855826  3.699999
 H  4.672571  -0.522367  3.699999
 H  -1.681128  -1.419331  3.699999
 H  0.414878  -2.863359  3.699999
 H  2.307093  3.296715  3.699999
 H  0.623054  2.835639  3.699999
30
adenine dimer 22
 N  0.095673  2.588361  0.000000
 C  0.460844  1.288246  0.000000
 N  1.759578  0.972543  0.000000
 C  2.107363  -0.329661  0.000000
 N  1.316357  -1.404115  0.000000
 C  0.027299  -1.048489  0.000000
 C  -0.486565  0.249767  0.000000
 N  -1.862783  0.255430  0.000000
 C  -2.176005  -1.030205  0.000000
 N  -1.085124  -1.855826  0.000000
 H  3.172571  -0.522367  0.000000
 H  -3.181128  -1.419331  0.000000
 H  -1.085122  -2.863359  0.000000
 H  0.807093  3.296715  0.000000
 H  -0.876946  2.835639  0.000000
 N  1.595672  2.588361  3.799999
 C  1.960844  1.288246  3.799999
 N  3.259578  0.972543  3.799999
 C  3.607363  -0.329661  3.799999
 N  2.816357  -1.404115  3.799999
 C  1.527299  -1.048489  3.799999
 C  1.013435  0.249767  3.799999
 N  -0.362783  0.255430  3.799999
 C  -0.676005  -1.030205  3.799999
 N  0.414876  -1.855826  3.799999
 H  4.672571  -0.522367  3.799999
 H  -1.681128  -1.419331  3.799999
 H  0.414878  -2.863359  3.799999
 H  2.307093  3.296715  3.799999
 H  0.623054  2.835639  3.799999
30
adenine dimer 23
 N  0.095673  2.588361  0.000000
 C  0.460844  1.288246  0.000000
 N  1.759578  0.972543  0.000000
 C  2.107363  -0.329661  0.000000
 N  1.316357  -1.404115  0.000000
 C  0.027299  -1.048489  0.000000
 C  -0.486565  0.249767  0.000000
 N  -1.862783  0.255430  0.000000
 C  -2.176005  -1.030205  0.000000
 N  -1.085124  -1.855826  0.000000
 H  3.172571  -0.522367  0.000000
 H  -3.181128  -1.419331  0.000000
 H  -1.085122  -2.863359  0.000000
 H  0.807093  3.296715  0.000000
 H  -0.876946  2.835639  0.000000
 N  1.595672  2.588361  3.899999
 C  1.960844  1.288246  3.899999
 N  3.259578  0.972543  3.899999
 C  3.607363  -0.329661  3.899999
 N  2.816357  -1.404115  3.899999
 C  1.527299  -1.048489  3.899999
 C  1.013435  0.249767  3.899999
 N  -0.362783  0.255430  3.899999
 C  -0.676005  -1.030205  3.899999
 N  0.414876  -1.855826  3.899999
 H  4.672571  -0.522367  3.899999
 H  -1.681128  -1.419331  3.899999
 H  0.414878  -2.863359  3.899999
 H  2.307093  3.296715  3.899999
 H  0.623054  2.835639  3.899999
30
adenine dimer 24
 N  0.095673  2.588361  0.000000
 C  0.460844  1.288246  0.000000
 N  1.759578  0.972543  0.000000
 C  2.107363  -0.329661  0.000000
 N  1.316357  -1.404115  0.000000
 C  0.027299  -1.048489  0.000000
 C  -0.486565  0.249767  0.000000
 N  -1.862783  0.255430  0.000000
 C  -2.176005  -1.030205  0.000000
 N  -1.085124  -1.855826  0.000000
 H  3.172571  -0.522367  0.000000
 H  -3.181128  -1.419331  0.000000
 H  -1.085122  -2.863359  0.000000
 H  0.807093  3.296715  0.000000
 H  -0.876946  2.835639  0.000000
 N  1.595672  2.588361  3.999999
 C  1.960844  1.288246  3.999999
 N  3.259578  0.972543  3.999999
 C  3.607363  -0.329661  3.999999
 N  2.816357  -1.404115  3.999999
 C  1.527299  -1.048489  3.999999
 C  1.013435  0.249767  3.999999
 N  -0.362783  0.255430  3.999999
 C  -0.676005  -1.030205  3.999999
 N  0.414876  -1.855826  3.999999
 H  4.672571  -0.522367  3.999999
 H  -1.681128  -1.419331  3.999999
 H  0.414878  -2.863359  3.999999
 H  2.307093  3.296715  3.999999
 H  0.623054  2.835639  3.999999
30
adenine dimer 25
 N  0.095673  2.588361  0.000000
 C  0.460844  1.288246  0.000000
 N  1.759578  0.972543  0.000000
 C  2.107363  -0.329661  0.000000
 N  1.316357  -1.404115  0.000000
 C  0.027299  -1.048489  0.000000
 C  -0.486565  0.249767  0.000000
 N  -1.862783  0.255430  0.000000
 C  -2.176005  -1.030205  0.000000
 N  -1.085124  -1.855826  0.000000
 H  3.172571  -0.522367  0.000000
 H  -3.181128  -1.419331  0.000000
 H  -1.085122  -2.863359  0.000000
 H  0.807093  3.296715  0.000000
 H  -0.876946  2.835639  0.000000
 N  0.095673  4.088361  2.900000
 C  0.460844  2.788246  2.900000
 N  1.759578  2.472543  2.900000
 C  2.107363  1.170339  2.900000
 N  1.316357  0.095885  2.900000
 C  0.027299  0.451511  2.900000
 C  -0.486565  1.749767  2.900000
 N  -1.862783  1.755430  2.900000
 C  -2.176005  0.469795  2.900000
 N  -1.085124  -0.355826  2.900000
 H  3.172571  0.977633  2.900000
 H  -3.181128  0.080669  2.900000
 H  -1.085122  -1.363359  2.900000
 H  0.807093  4.796716  2.900000
 H  -0.876946  4.335639  2.900000
30
adenine dimer 26
 N  0.095673  2.588361  0.000000
 C  0.460844  1.288246  0.000000
 N  1.759578  0.972543  0.000000
 C  2.107363  -0.329661  0.000000
 N  1.316357  -1.404115  0.000000
 C  0.027299  -1.048489  0.000000
 C  -0.486565  0.249767  0.000000
 N  -1.862783  0.255430  0.000000
 C  -2.176005  -1.030205  0.000000
 N  -1.085124  -1.855826  0.000000
 H  3.172571  -0.522367  0.000000
 H  -3.181128  -1.419331  0.000000
 H  -1.085122  -2.863359  0.000000
 H  0.807093  3.296715  0.000000
 H  -0.876946  2.835639  0.000000
 N  0.095673  4.088361  3.000000
 C  0.460844  2.788246  3.000000
 N  1.759578  2.472543  3.000000
 C  2.107363  1.170339  3.000000
 N  1.316357  0.095885  3.000000
 C  0.027299  0.451511  3.000000
 C  -0.486565  1.749767  3.000000
 N  -1.862783  1.755430  3.000000
 C  -2.176005  0.469795  3.000000
 N  -1.085124  -0.355826  3.000000
 H  3.172571  0.977633  3.000000
 H  -3.181128  0.080669  3.000000
 H  -1.085122  -1.363359  3.000000
 H  0.807093  4.796716  3.000000
 H  -0.876946  4.335639  3.000000
30
adenine dimer 27
 N  0.095673  2.588361  0.000000
 C  0.460844  1.288246  0.000000
 N  1.759578  0.972543  0.000000
 C  2.107363  -0.329661  0.000000
 N  1.316357  -1.404115  0.000000
 C  0.027299  -1.048489  0.000000
 C  -0.486565  0.249767  0.000000
 N  -1.862783  0.255430  0.000000
 C  -2.176005  -1.030205  0.000000
 N  -1.085124  -1.855826  0.000000
 H  3.172571  -0.522367  0.000000
 H  -3.181128  -1.419331  0.000000
 H  -1.085122  -2.863359  0.000000
 H  0.807093  3.296715  0.000000
 H  -0.876946  2.835639  0.000000
 N  0.095673  4.088361  3.100000
 C  0.460844  2.788246  3.100000
 N  1.759578  2.472543  3.100000
 C  2.107363  1.170339  3.100000
 N  1.316357  0.095885  3.100000
 C  0.027299  0.451511  3.100000
 C  -0.486565  1.749767  3.100000
 N  -1.862783  1.755430  3.100000
 C  -2.176005  0.469795  3.100000
 N  -1.085124  -0.355826  3.100000
 H  3.172571  0.977633  3.100000
 H  -3.181128  0.080669  3.100000
 H  -1.085122  -1.363359  3.100000
 H  0.807093  4.796716  3.100000
 H  -0.876946  4.335639  3.100000
30
adenine dimer 28
 N  0.095673  2.588361  0.000000
 C  0.460844  1.288246  0.000000
 N  1.759578  0.972543  0.000000
 C  2.107363  -0.329661  0.000000
 N  1.316357  -1.404115  0.000000
 C  0.027299  -1.048489  0.000000
 C  -0.486565  0.249767  0.000000
 N  -1.862783  0.255430  0.000000
 C  -2.176005  -1.030205  0.000000
 N  -1.085124  -1.855826  0.000000
 H  3.172571  -0.522367  0.000000
 H  -3.181128  -1.419331  0.000000
 H  -1.085122  -2.863359  0.000000
 H  0.807093  3.296715  0.000000
 H  -0.876946  2.835639  0.000000
 N  0.095673  4.088361  3.200000
 C  0.460844  2.788246  3.200000
 N  1.759578  2.472543  3.200000
 C  2.107363  1.170339  3.200000
 N  1.316357  0.095885  3.200000
 C  0.027299  0.451511  3.200000
 C  -0.486565  1.749767  3.200000
 N  -1.862783  1.755430  3.200000
 C  -2.176005  0.469795  3.200000
 N  -1.085124  -0.355826  3.200000
 H  3.172571  0.977633  3.200000
 H  -3.181128  0.080669  3.200000
 H  -1.085122  -1.363359  3.200000
 H  0.807093  4.796716  3.200000
 H  -0.876946  4.335639  3.200000
30
adenine dimer 29
 N  0.095673  2.588361  0.000000
 C  0.460844  1.288246  0.000000
 N  1.759578  0.972543  0.000000
 C  2.107363  -0.329661  0.000000
 N  1.316357  -1.404115  0.000000
 C  0.027299  -1.048489  0.000000
 C  -0.486565  0.249767  0.000000
 N  -1.862783  0.255430  0.000000
 C  -2.176005  -1.030205  0.000000
 N  -1.085124  -1.855826  0.000000
 H  3.172571  -0.522367  0.000000
 H  -3.181128  -1.419331  0.000000
 H  -1.085122  -2.863359  0.000000
 H  0.807093  3.296715  0.000000
 H  -0.876946  2.835639  0.000000
 N  0.095673  4.088361  3.299999
 C  0.460844  2.788246  3.299999
 N  1.759578  2.472543  3.299999
 C  2.107363  1.170339  3.299999
 N  1.316357  0.095885  3.299999
 C  0.027299  0.451511  3.299999
 C  -0.486565  1.749767  3.299999
 N  -1.862783  1.755430  3.299999
 C  -2.176005  0.469795  3.299999
 N  -1.085124  -0.355826  3.299999
 H  3.172571  0.977633  3.299999
 H  -3.181128  0.080669  3.299999
 H  -1.085122  -1.363359  3.299999
 H  0.807093  4.796716  3.299999
 H  -0.876946  4.335639  3.299999
30
adenine dimer 30
 N  0.095673  2.588361  0.000000
 C  0.460844  1.288246  0.000000
 N  1.759578  0.972543  0.000000
 C  2.107363  -0.329661  0.000000
 N  1.316357  -1.404115  0.000000
 C  0.027299  -1.048489  0.000000
 C  -0.486565  0.249767  0.000000
 N  -1.862783  0.255430  0.000000
 C  -2.176005  -1.030205  0.000000
 N  -1.085124  -1.855826  0.000000
 H  3.172571  -0.522367  0.000000
 H  -3.181128  -1.419331  0.000000
 H  -1.085122  -2.863359  0.000000
 H  0.807093  3.296715  0.000000
 H  -0.876946  2.835639  0.000000
 N  0.095673  4.088361  3.399999
 C  0.460844  2.788246  3.399999
 N  1.759578  2.472543  3.399999
 C  2.107363  1.170339  3.399999
 N  1.316357  0.095885  3.399999
 C  0.027299  0.451511  3.399999
 C  -0.486565  1.749767  3.399999
 N  -1.862783  1.755430  3.399999
 C  -2.176005  0.469795  3.399999
 N  -1.085124  -0.355826  3.399999
 H  3.172571  0.977633  3.399999
 H  -3.181128  0.080669  3.399999
 H  -1.085122  -1.363359  3.399999
 H  0.807093  4.796716  3.399999
 H  -0.876946  4.335639  3.399999
30
adenine dimer 31
 N  0.095673  2.588361  0.000000
 C  0.460844  1.288246  0.000000
 N  1.759578  0.972543  0.000000
 C  2.107363  -0.329661  0.000000
 N  1.316357  -1.404115  0.000000
 C  0.027299  -1.048489  0.000000
 C  -0.486565  0.249767  0.000000
 N  -1.862783  0.255430  0.000000
 C  -2.176005  -1.030205  0.000000
 N  -1.085124  -1.855826  0.000000
 H  3.172571  -0.522367  0.000000
 H  -3.181128  -1.419331  0.000000
 H  -1.085122  -2.863359  0.000000
 H  0.807093  3.296715  0.000000
 H  -0.876946  2.835639  0.000000
 N  0.095673  4.088361  3.499999
 C  0.460844  2.788246  3.499999
 N  1.759578  2.472543  3.499999
 C  2.107363  1.170339  3.499999
 N  1.316357  0.095885  3.499999
 C  0.027299  0.451511  3.499999
 C  -0.486565  1.749767  3.499999
 N  -1.862783  1.755430  3.499999
 C  -2.176005  0.469795  3.499999
 N  -1.085124  -0.355826  3.499999
 H  3.172571  0.977633  3.499999
 H  -3.181128  0.080669  3.499999
 H  -1.085122  -1.363359  3.499999
 H  0.807093  4.796716  3.499999
 H  -0.876946  4.335639  3.499999
30
adenine dimer 32
 N  0.095673  2.588361  0.000000
 C  0.460844  1.288246  0.000000
 N  1.759578  0.972543  0.000000
 C  2.107363  -0.329661  0.000000
 N  1.316357  -1.404115  0.000000
 C  0.027299  -1.048489  0.000000
 C  -0.486565  0.249767  0.000000
 N  -1.862783  0.255430  0.000000
 C  -2.176005  -1.030205  0.000000
 N  -1.085124  -1.855826  0.000000
 H  3.172571  -0.522367  0.000000
 H  -3.181128  -1.419331  0.000000
 H  -1.085122  -2.863359  0.000000
 H  0.807093  3.296715  0.000000
 H  -0.876946  2.835639  0.000000
 N  0.095673  4.088361  3.599999
 C  0.460844  2.788246  3.599999
 N  1.759578  2.472543  3.599999
 C  2.107363  1.170339  3.599999
 N  1.316357  0.095885  3.599999
 C  0.027299  0.451511  3.599999
 C  -0.486565  1.749767  3.599999
 N  -1.862783  1.755430  3.599999
 C  -2.176005  0.469795  3.599999
 N  -1.085124  -0.355826  3.599999
 H  3.172571  0.977633  3.599999
 H  -3.181128  0.080669  3.599999
 H  -1.085122  -1.363359  3.599999
 H  0.807093  4.796716  3.599999
 H  -0.876946  4.335639  3.599999
30
adenine dimer 33
 N  0.095673  2.588361  0.000000
 C  0.460844  1.288246  0.000000
 N  1.759578  0.972543  0.000000
 C  2.107363  -0.329661  0.000000
 N  1.316357  -1.404115  0.000000
 C  0.027299  -1.048489  0.000000
 C  -0.486565  0.249767  0.000000
 N  -1.862783  0.255430  0.000000
 C  -2.176005  -1.030205  0.000000
 N  -1.085124  -1.855826  0.000000
 H  3.172571  -0.522367  0.000000
 H  -3.181128  -1.419331  0.000000
 H  -1.085122  -2.863359  0.000000
 H  0.807093  3.296715  0.000000
 H  -0.876946  2.835639  0.000000
 N  0.095673  4.088361  3.699999
 C  0.460844  2.788246  3.699999
 N  1.759578  2.472543  3.699999
 C  2.107363  1.170339  3.699999
 N  1.316357  0.095885  3.699999
 C  0.027299  0.451511  3.699999
 C  -0.486565  1.749767  3.699999
 N  -1.862783  1.755430  3.699999
 C  -2.176005  0.469795  3.699999
 N  -1.085124  -0.355826  3.699999
 H  3.172571  0.977633  3.699999
 H  -3.181128  0.080669  3.699999
 H  -1.085122  -1.363359  3.699999
 H  0.807093  4.796716  3.699999
 H  -0.876946  4.335639  3.699999
30
adenine dimer 34
 N  0.095673  2.588361  0.000000
 C  0.460844  1.288246  0.000000
 N  1.759578  0.972543  0.000000
 C  2.107363  -0.329661  0.000000
 N  1.316357  -1.404115  0.000000
 C  0.027299  -1.048489  0.000000
 C  -0.486565  0.249767  0.000000
 N  -1.862783  0.255430  0.000000
 C  -2.176005  -1.030205  0.000000
 N  -1.085124  -1.855826  0.000000
 H  3.172571  -0.522367  0.000000
 H  -3.181128  -1.419331  0.000000
 H  -1.085122  -2.863359  0.000000
 H  0.807093  3.296715  0.000000
 H  -0.876946  2.835639  0.000000
 N  0.095673  4.088361  3.799999
 C  0.460844  2.788246  3.799999
 N  1.759578  2.472543  3.799999
 C  2.107363  1.170339  3.799999
 N  1.316357  0.095885  3.799999
 C  0.027299  0.451511  3.799999
 C  -0.486565  1.749767  3.799999
 N  -1.862783  1.755430  3.799999
 C  -2.176005  0.469795  3.799999
 N  -1.085124  -0.355826  3.799999
 H  3.172571  0.977633  3.799999
 H  -3.181128  0.080669  3.799999
 H  -1.085122  -1.363359  3.799999
 H  0.807093  4.796716  3.799999
 H  -0.876946  4.335639  3.799999
30
adenine dimer 35
 N  0.095673  2.588361  0.000000
 C  0.460844  1.288246  0.000000
 N  1.759578  0.972543  0.000000
 C  2.107363  -0.329661  0.000000
 N  1.316357  -1.404115  0.000000
 C  0.027299  -1.048489  0.000000
 C  -0.486565  0.249767  0.000000
 N  -1.862783  0.255430  0.000000
 C  -2.176005  -1.030205  0.000000
 N  -1.085124  -1.855826  0.000000
 H  3.172571  -0.522367  0.000000
 H  -3.181128  -1.419331  0.000000
 H  -1.085122  -2.863359  0.000000
 H  0.807093  3.296715  0.000000
 H  -0.876946  2.835639  0.000000
 N  0.095673  4.088361  3.899999
 C  0.460844  2.788246  3.899999
 N  1.759578  2.472543  3.899999
 C  2.107363  1.170339  3.899999
 N  1.316357  0.095885  3.899999
 C  0.027299  0.451511  3.899999
 C  -0.486565  1.749767  3.899999
 N  -1.862783  1.755430  3.899999
 C  -2.176005  0.469795  3.899999
 N  -1.085124  -0.355826  3.899999
 H  3.172571  0.977633  3.899999
 H  -3.181128  0.080669  3.899999
 H  -1.085122  -1.363359  3.899999
 H  0.807093  4.796716  3.899999
 H  -0.876946  4.335639  3.899999
30
adenine dimer 36
 N  0.095673  2.588361  0.000000
 C  0.460844  1.288246  0.000000
 N  1.759578  0.972543  0.000000
 C  2.107363  -0.329661  0.000000
 N  1.316357  -1.404115  0.000000
 C  0.027299  -1.048489  0.000000
 C  -0.486565  0.249767  0.000000
 N  -1.862783  0.255430  0.000000
 C  -2.176005  -1.030205  0.000000
 N  -1.085124  -1.855826  0.000000
 H  3.172571  -0.522367  0.000000
 H  -3.181128  -1.419331  0.000000
 H  -1.085122  -2.863359  0.000000
 H  0.807093  3.296715  0.000000
 H  -0.876946  2.835639  0.000000
 N  0.095673  4.088361  3.999999
 C  0.460844  2.788246  3.999999
 N  1.759578  2.472543  3.999999
 C  2.107363  1.170339  3.999999
 N  1.316357  0.095885  3.999999
 C  0.027299  0.451511  3.999999
 C  -0.486565  1.749767  3.999999
 N  -1.862783  1.755430  3.999999
 C  -2.176005  0.469795  3.999999
 N  -1.085124  -0.355826  3.999999
 H  3.172571  0.977633  3.999999
 H  -3.181128  0.080669  3.999999
 H  -1.085122  -1.363359  3.999999
 H  0.807093  4.796716  3.999999
 H  -0.876946  4.335639  3.999999
30
adenine dimer 37
 N  0.095673  2.588361  0.000000
 C  0.460844  1.288246  0.000000
 N  1.759578  0.972543  0.000000
 C  2.107363  -0.329661  0.000000
 N  1.316357  -1.404115  0.000000
 C  0.027299  -1.048489  0.000000
 C  -0.486565  0.249767  0.000000
 N  -1.862783  0.255430  0.000000
 C  -2.176005  -1.030205  0.000000
 N  -1.085124  -1.855826  0.000000
 H  3.172571  -0.522367  0.000000
 H  -3.181128  -1.419331  0.000000
 H  -1.085122  -2.863359  0.000000
 H  0.807093  3.296715  0.000000
 H  -0.876946  2.835639  0.000000
 N  -0.095672  -2.588361  2.900000
 C  -0.460843  -1.288247  2.900000
 N  -1.759578  -0.972544  2.900000
 C  -2.107363  0.329661  2.900000
 N  -1.316357  1.404114  2.900000
 C  -0.027299  1.048489  2.900000
 C  0.486565  -0.249767  2.900000
 N  1.862784  -0.255430  2.900000
 C  2.176004  1.030205  2.900000
 N  1.085123  1.855827  2.900000
 H  -3.172571  0.522366  2.900000
 H  3.181128  1.419332  2.900000
 H  1.085121  2.863360  2.900000
 H  -0.807092  -3.296716  2.900000
 H  0.876947  -2.835638  2.900000
30
adenine dimer 38
 N  0.095673  2.588361  0.000000
 C  0.460844  1.288246  0.000000
 N  1.759578  0.972543  0.000000
 C  2.107363  -0.329661  0.000000
 N  1.316357  -1.404115  0.000000
 C  0.027299  -1.048489  0.000000
 C  -0.486565  0.249767  0.000000
 N  -1.862783  0.255430  0.000000
 C  -2.176005  -1.030205  0.000000
 N  -1.085124  -1.855826  0.000000
 H  3.172571  -0.522367  0.000000
 H  -3.181128  -1.419331  0.000000
 H  -1.085122  -2.863359  0.000000
 H  0.807093  3.296715  0.000000
 H  -0.876946  2.835639  0.000000
 N  -0.095672  -2.588361  3.000000
 C  -0.460843  -1.288247  3.000000
 N  -1.759578  -0.972544  3.000000
 C  -2.107363  0.329661  3.000000
 N  -1.316357  1.404114  3.000000
 C  -0.027299  1.048489  3.000000
 C  0.486565  -0.249767  3.000000
 N  1.862784  -0.255430  3.000000
 C  2.176004  1.030205  3.000000
 N  1.085123  1.855827  3.000000
 H  -3.172571  0.522366  3.000000
 H  3.181128  1.419332  3.000000
 H  1.085121  2.863360  3.000000
 H  -0.807092  -3.296716  3.000000
 H  0.876947  -2.835638  3.000000
30
adenine dimer 39
 N  0.095673  2.588361  0.000000
 C  0.460844  1.288246  0.000000
 N  1.759578  0.972543  0.000000
 C  2.107363  -0.329661  0.000000
 N  1.316357  -1.404115  0.000000
 C  0.027299  -1.048489  0.000000
 C  -0.486565  0.249767  0.000000
 N  -1.862783  0.255430  0.000000
 C  -2.176005  -1.030205  0.000000
 N  -1.085124  -1.855826  0.000000
 H  3.172571  -0.522367  0.000000
 H  -3.181128  -1.419331  0.000000
 H  -1.085122  -2.863359  0.000000
 H  0.807093  3.296715  0.000000
 H  -0.876946  2.835639  0.000000
 N  -0.095672  -2.588361  3.100000
 C  -0.460843  -1.288247  3.100000
 N  -1.759578  -0.972544  3.100000
 C  -2.107363  0.329661  3.100000
 N  -1.316357  1.404114  3.100000
 C  -0.027299  1.048489  3.100000
 C  0.486565  -0.249767  3.100000
 N  1.862784  -0.255430  3.100000
 C  2.176004  1.030205  3.100000
 N  1.085123  1.855827  3.100000
 H  -3.172571  0.522366  3.100000
 H  3.181128  1.419332  3.100000
 H  1.085121  2.863360  3.100000
 H  -0.807092  -3.296716  3.100000
 H  0.876947  -2.835638  3.100000
30
adenine dimer 40
 N  0.095673  2.588361  0.000000
 C  0.460844  1.288246  0.000000
 N  1.759578  0.972543  0.000000
 C  2.107363  -0.329661  0.000000
 N  1.316357  -1.404115  0.000000
 C  0.027299  -1.048489  0.000000
 C  -0.486565  0.249767  0.000000
 N  -1.862783  0.255430  0.000000
 C  -2.176005  -1.030205  0.000000
 N  -1.085124  -1.855826  0.000000
 H  3.172571  -0.522367  0.000000
 H  -3.181128  -1.419331  0.000000
 H  -1.085122  -2.863359  0.000000
 H  0.807093  3.296715  0.000000
 H  -0.876946  2.835639  0.000000
 N  -0.095672  -2.588361  3.200000
 C  -0.460843  -1.288247  3.200000
 N  -1.759578  -0.972544  3.200000
 C  -2.107363  0.329661  3.200000
 N  -1.316357  1.404114  3.200000
 C  -0.027299  1.048489  3.200000
 C  0.486565  -0.249767  3.200000
 N  1.862784  -0.255430  3.200000
 C  2.176004  1.030205  3.200000
 N  1.085123  1.855827  3.200000
 H  -3.172571  0.522366  3.200000
 H  3.181128  1.419332  3.200000
 H  1.085121  2.863360  3.200000
 H  -0.807092  -3.296716  3.200000
 H  0.876947  -2.835638  3.200000
30
adenine dimer 41
 N  0.095673  2.588361  0.000000
 C  0.460844  1.288246  0.000000
 N  1.759578  0.972543  0.000000
 C  2.107363  -0.329661  0.000000
 N  1.316357  -1.404115  0.000000
 C  0.027299  -1.048489  0.000000
 C  -0.486565  0.249767  0.000000
 N  -1.862783  0.255430  0.000000
 C  -2.176005  -1.030205  0.000000
 N  -1.085124  -1.855826  0.000000
 H  3.172571  -0.522367  0.000000
 H  -3.181128  -1.419331  0.000000
 H  -1.085122  -2.863359  0.000000
 H  0.807093  3.296715  0.000000
 H  -0.876946  2.835639  0.000000
 N  -0.095672  -2.588361  3.299999
 C  -0.460843  -1.288247  3.299999
 N  -1.759578  -0.972544  3.299999
 C  -2.107363  0.329661  3.299999
 N  -1.316357  1.404114  3.299999
 C  -0.027299  1.048489  3.299999
 C  0.486565  -0.249767  3.299999
 N  1.862784  -0.255430  3.299999
 C  2.176004  1.030205  3.299999
 N  1.085123  1.855827  3.299999
 H  -3.172571  0.522366  3.299999
 H  3.181128  1.419332  3.299999
 H  1.085121  2.863360  3.299999
 H  -0.807092  -3.296716  3.299999
 H  0.876947  -2.835638  3.299999
30
adenine dimer 42
 N  0.095673  2.588361  0.000000
 C  0.460844  1.288246  0.000000
 N  1.759578  0.972543  0.000000
 C  2.107363  -0.329661  0.000000
 N  1.316357  -1.404115  0.000000
 C  0.027299  -1.048489  0.000000
 C  -0.486565  0.249767  0.000000
 N  -1.862783  0.255430  0.000000
 C  -2.176005  -1.030205  0.000000
 N  -1.085124  -1.855826  0.000000
 H  3.172571  -0.522367  0.000000
 H  -3.181128  -1.419331  0.000000
 H  -1.085122  -2.863359  0.000000
 H  0.807093  3.296715  0.000000
 H  -0.876946  2.835639  0.000000
 N  -0.095672  -2.588361  3.399999
 C  -0.460843  -1.288247  3.399999
 N  -1.759578  -0.972544  3.399999
 C  -2.107363  0.329661  3.399999
 N  -1.316357  1.404114  3.399999
 C  -0.027299  1.048489  3.399999
 C  0.486565  -0.249767  3.399999
 N  1.862784  -0.255430  3.399999
 C  2.176004  1.030205  3.399999
 N  1.085123  1.855827  3.399999
 H  -3.172571  0.522366  3.399999
 H  3.181128  1.419332  3.399999
 H  1.085121  2.863360  3.399999
 H  -0.807092  -3.296716  3.399999
 H  0.876947  -2.835638  3.399999
30
adenine dimer 43
 N  0.095673  2.588361  0.000000
 C  0.460844  1.288246  0.000000
 N  1.759578  0.972543  0.000000
 C  2.107363  -0.329661  0.000000
 N  1.316357  -1.404115  0.000000
 C  0.027299  -1.048489  0.000000
 C  -0.486565  0.249767  0.000000
 N  -1.862783  0.255430  0.000000
 C  -2.176005  -1.030205  0.000000
 N  -1.085124  -1.855826  0.000000
 H  3.172571  -0.522367  0.000000
 H  -3.181128  -1.419331  0.000000
 H  -1.085122  -2.863359  0.000000
 H  0.807093  3.296715  0.000000
 H  -0.876946  2.835639  0.000000
 N  -0.095672  -2.588361  3.499999
 C  -0.460843  -1.288247  3.499999
 N  -1.759578  -0.972544  3.499999
 C  -2.107363  0.329661  3.499999
 N  -1.316357  1.404114  3.499999
 C  -0.027299  1.048489  3.499999
 C  0.486565  -0.249767  3.499999
 N  1.862784  -0.255430  3.499999
 C  2.176004  1.030205  3.499999
 N  1.085123  1.855827  3.499999
 H  -3.172571  0.522366  3.499999
 H  3.181128  1.419332  3.499999
 H  1.085121  2.863360  3.499999
 H  -0.807092  -3.296716  3.499999
 H  0.876947  -2.835638  3.499999
30
adenine dimer 44
 N  0.095673  2.588361  0.000000
 C  0.460844  1.288246  0.000000
 N  1.759578  0.972543  0.000000
 C  2.107363  -0.329661  0.000000
 N  1.316357  -1.404115  0.000000
 C  0.027299  -1.048489  0.000000
 C  -0.486565  0.249767  0.000000
 N  -1.862783  0.255430  0.000000
 C  -2.176005  -1.030205  0.000000
 N  -1.085124  -1.855826  0.000000
 H  3.172571  -0.522367  0.000000
 H  -3.181128  -1.419331  0.000000
 H  -1.085122  -2.863359  0.000000
 H  0.807093  3.296715  0.000000
 H  -0.876946  2.835639  0.000000
 N  -0.095672  -2.588361  3.599999
 C  -0.460843  -1.288247  3.599999
 N  -1.759578  -0.972544  3.599999
 C  -2.107363  0.329661  3.599999
 N  -1.316357  1.404114  3.599999
 C  -0.027299  1.048489  3.599999
 C  0.486565  -0.249767  3.599999
 N  1.862784  -0.255430  3.599999
 C  2.176004  1.030205  3.599999
 N  1.085123  1.855827  3.599999
 H  -3.172571  0.522366  3.599999
 H  3.181128  1.419332  3.599999
 H  1.085121  2.863360  3.599999
 H  -0.807092  -3.296716  3.599999
 H  0.876947  -2.835638  3.599999
30
adenine dimer 45
 N  0.095673  2.588361  0.000000
 C  0.460844  1.288246  0.000000
 N  1.759578  0.972543  0.000000
 C  2.107363  -0.329661  0.000000
 N  1.316357  -1.404115  0.000000
 C  0.027299  -1.048489  0.000000
 C  -0.486565  0.249767  0.000000
 N  -1.862783  0.255430  0.000000
 C  -2.176005  -1.030205  0.000000
 N  -1.085124  -1.855826  0.000000
 H  3.172571  -0.522367  0.000000
 H  -3.181128  -1.419331  0.000000
 H  -1.085122  -2.863359  0.000000
 H  0.807093  3.296715  0.000000
 H  -0.876946  2.835639  0.000000
 N  -0.095672  -2.588361  3.699999
 C  -0.460843  -1.288247  3.699999
 N  -1.759578  -0.972544  3.699999
 C  -2.107363  0.329661  3.699999
 N  -1.316357  1.404114  3.699999
 C  -0.027299  1.048489  3.699999
 C  0.486565  -0.249767  3.699999
 N  1.862784  -0.255430  3.699999
 C  2.176004  1.030205  3.699999
 N  1.085123  1.855827  3.699999
 H  -3.172571  0.522366  3.699999
 H  3.181128  1.419332  3.699999
 H  1.085121  2.863360  3.699999
 H  -0.807092  -3.296716  3.699999
 H  0.876947  -2.835638  3.699999
30
adenine dimer 46
 N  0.095673  2.588361  0.000000
 C  0.460844  1.288246  0.000000
 N  1.759578  0.972543  0.000000
 C  2.107363  -0.329661  0.000000
 N  1.316357  -1.404115  0.000000
 C  0.027299  -1.048489  0.000000
 C  -0.486565  0.249767  0.000000
 N  -1.862783  0.255430  0.000000
 C  -2.176005  -1.030205  0.000000
 N  -1.085124  -1.855826  0.000000
 H  3.172571  -0.522367  0.000000
 H  -3.181128  -1.419331  0.000000
 H  -1.085122  -2.863359  0.000000
 H  0.807093  3.296715  0.000000
 H  -0.876946  2.835639  0.000000
 N  -0.095672  -2.588361  3.799999
 C  -0.460843  -1.288247  3.799999
 N  -1.759578  -0.972544  3.799999
 C  -2.107363  0.329661  3.799999
 N  -1.316357  1.404114  3.799999
 C  -0.027299  1.048489  3.799999
 C  0.486565  -0.249767  3.799999
 N  1.862784  -0.255430  3.799999
 C  2.176004  1.030205  3.799999
 N  1.085123  1.855827  3.799999
 H  -3.172571  0.522366  3.799999
 H  3.181128  1.419332  3.799999
 H  1.085121  2.863360  3.799999
 H  -0.807092  -3.296716  3.799999
 H  0.876947  -2.835638  3.799999
30
adenine dimer 47
 N  0.095673  2.588361  0.000000
 C  0.460844  1.288246  0.000000
 N  1.759578  0.972543  0.000000
 C  2.107363  -0.329661  0.000000
 N  1.316357  -1.404115  0.000000
 C  0.027299  -1.048489  0.000000
 C  -0.486565  0.249767  0.000000
 N  -1.862783  0.255430  0.000000
 C  -2.176005  -1.030205  0.000000
 N  -1.085124  -1.855826  0.000000
 H  3.172571  -0.522367  0.000000
 H  -3.181128  -1.419331  0.000000
 H  -1.085122  -2.863359  0.000000
 H  0.807093  3.296715  0.000000
 H  -0.876946  2.835639  0.000000
 N  -0.095672  -2.588361  3.899999
 C  -0.460843  -1.288247  3.899999
 N  -1.759578  -0.972544  3.899999
 C  -2.107363  0.329661  3.899999
 N  -1.316357  1.404114  3.899999
 C  -0.027299  1.048489  3.899999
 C  0.486565  -0.249767  3.899999
 N  1.862784  -0.255430  3.899999
 C  2.176004  1.030205  3.899999
 N  1.085123  1.855827  3.899999
 H  -3.172571  0.522366  3.899999
 H  3.181128  1.419332  3.899999
 H  1.085121  2.863360  3.899999
 H  -0.807092  -3.296716  3.899999
 H  0.876947  -2.835638  3.899999
30
adenine dimer 48
 N  0.095673  2.588361  0.000000
 C  0.460844  1.288246  0.000000
 N  1.759578  0.972543  0.000000
 C  2.107363  -0.329661  0.000000
 N  1.316357  -1.404115  0.000000
 C  0.027299  -1.048489  0.000000
 C  -0.486565  0.249767  0.000000
 N  -1.862783  0.255430  0.000000
 C  -2.176005  -1.030205  0.000000
 N  -1.085124  -1.855826  0.000000
 H  3.172571  -0.522367  0.000000
 H  -3.181128  -1.419331  0.000000
 H  -1.085122  -2.863359  0.000000
 H  0.807093  3.296715  0.000000
 H  -0.876946  2.835639  0.000000
 N  -0.095672  -2.588361  3.999999
 C  -0.460843  -1.288247  3.999999
 N  -1.759578  -0.972544  3.999999
 C  -2.107363  0.329661  3.999999
 N  -1.316357  1.404114  3.999999
 C  -0.027299  1.048489  3.999999
 C  0.486565  -0.249767  3.999999
 N  1.862784  -0.255430  3.999999
 C  2.176004  1.030205  3.999999
 N  1.085123  1.855827  3.999999
 H  -3.172571  0.522366  3.999999
 H  3.181128  1.419332  3.999999
 H  1.085121  2.863360  3.999999
 H  -0.807092  -3.296716  3.999999
 H  0.876947  -2.835638  3.999999
30
adenine dimer 49
 N  0.095673  2.588361  0.000000
 C  0.460844  1.288246  0.000000
 N  1.759578  0.972543  0.000000
 C  2.107363  -0.329661  0.000000
 N  1.316357  -1.404115  0.000000
 C  0.027299  -1.048489  0.000000
 C  -0.486565  0.249767  0.000000
 N  -1.862783  0.255430  0.000000
 C  -2.176005  -1.030205  0.000000
 N  -1.085124  -1.855826  0.000000
 H  3.172571  -0.522367  0.000000
 H  -3.181128  -1.419331  0.000000
 H  -1.085122  -2.863359  0.000000
 H  0.807093  3.296715  0.000000
 H  -0.876946  2.835639  0.000000
 N  1.404328  -2.588361  2.900000
 C  1.039157  -1.288247  2.900000
 N  -0.259578  -0.972544  2.900000
 C  -0.607363  0.329661  2.900000
 N  0.183643  1.404114  2.900000
 C  1.472701  1.048489  2.900000
 C  1.986565  -0.249767  2.900000
 N  3.362783  -0.255430  2.900000
 C  3.676004  1.030205  2.900000
 N  2.585123  1.855827  2.900000
 H  -1.672571  0.522366  2.900000
 H  4.681128  1.419332  2.900000
 H  2.585121  2.863360  2.900000
 H  0.692908  -3.296716  2.900000
 H  2.376947  -2.835638  2.900000
30
adenine dimer 50
 N  0.095673  2.588361  0.000000
 C  0.460844  1.288246  0.000000
 N  1.759578  0.972543  0.000000
 C  2.107363  -0.329661  0.000000
 N  1.316357  -1.404115  0.000000
 C  0.027299  -1.048489  0.000000
 C  -0.486565  0.249767  0.000000
 N  -1.862783  0.255430  0.000000
 C  -2.176005  -1.030205  0.000000
 N  -1.085124  -1.855826  0.000000
 H  3.172571  -0.522367  0.000000
 H  -3.181128  -1.419331  0.000000
 H  -1.085122  -2.863359  0.000000
 H  0.807093  3.296715  0.000000
 H  -0.876946  2.835639  0.000000
 N  1.404328  -2.588361  3.000000
 C  1.039157  -1.288247  3.000000
 N  -0.259578  -0.972544  3.000000
 C  -0.607363  0.329661  3.000000
 N  0.183643  1.404114  3.000000
 C  1.472701  1.048489  3.000000
 C  1.986565  -0.249767  3.000000
 N  3.362783  -0.255430  3.000000
 C  3.676004  1.030205  3.000000
 N  2.585123  1.855827  3.000000
 H  -1.672571  0.522366  3.000000
 H  4.681128  1.419332  3.000000
 H  2.585121  2.863360  3.000000
 H  0.692908  -3.296716  3.000000
 H  2.376947  -2.835638  3.000000
30
adenine dimer 51
 N  0.095673  2.588361  0.000000
 C  0.460844  1.288246  0.000000
 N  1.759578  0.972543  0.000000
 C  2.107363  -0.329661  0.000000
 N  1.316357  -1.404115  0.000000
 C  0.027299  -1.048489  0.000000
 C  -0.486565  0.249767  0.000000
 N  -1.862783  0.255430  0.000000
 C  -2.176005  -1.030205  0.000000
 N  -1.085124  -1.855826  0.000000
 H  3.172571  -0.522367  0.000000
 H  -3.181128  -1.419331  0.000000
 H  -1.085122  -2.863359  0.000000
 H  0.807093  3.296715  0.000000
 H  -0.876946  2.835639  0.000000
 N  1.404328  -2.588361  3.100000
 C  1.039157  -1.288247  3.100000
 N  -0.259578  -0.972544  3.100000
 C  -0.607363  0.329661  3.100000
 N  0.183643  1.404114  3.100000
 C  1.472701  1.048489  3.100000
 C  1.986565  -0.249767  3.100000
 N  3.362783  -0.255430  3.100000
 C  3.676004  1.030205  3.100000
 N  2.585123  1.855827  3.100000
 H  -1.672571  0.522366  3.100000
 H  4.681128  1.419332  3.100000
 H  2.585121  2.863360  3.100000
 H  0.692908  -3.296716  3.100000
 H  2.376947  -2.835638  3.100000
30
adenine dimer 52
 N  0.095673  2.588361  0.000000
 C  0.460844  1.288246  0.000000
 N  1.759578  0.972543  0.000000
 C  2.107363  -0.329661  0.000000
 N  1.316357  -1.404115  0.000000
 C  0.027299  -1.048489  0.000000
 C  -0.486565  0.249767  0.000000
 N  -1.862783  0.255430  0.000000
 C  -2.176005  -1.030205  0.000000
 N  -1.085124  -1.855826  0.000000
 H  3.172571  -0.522367  0.000000
 H  -3.181128  -1.419331  0.000000
 H  -1.085122  -2.863359  0.000000
 H  0.807093  3.296715  0.000000
 H  -0.876946  2.835639  0.000000
 N  1.404328  -2.588361  3.200000
 C  1.039157  -1.288247  3.200000
 N  -0.259578  -0.972544  3.200000
 C  -0.607363  0.329661  3.200000
 N  0.183643  1.404114  3.200000
 C  1.472701  1.048489  3.200000
 C  1.986565  -0.249767  3.200000
 N  3.362783  -0.255430  3.200000
 C  3.676004  1.030205  3.200000
 N  2.585123  1.855827  3.200000
 H  -1.672571  0.522366  3.200000
 H  4.681128  1.419332  3.200000
 H  2.585121  2.863360  3.200000
 H  0.692908  -3.296716  3.200000
 H  2.376947  -2.835638  3.200000
30
adenine dimer 53
 N  0.095673  2.588361  0.000000
 C  0.460844  1.288246  0.000000
 N  1.759578  0.972543  0.000000
 C  2.107363  -0.329661  0.000000
 N  1.316357  -1.404115  0.000000
 C  0.027299  -1.048489  0.000000
 C  -0.486565  0.249767  0.000000
 N  -1.862783  0.255430  0.000000
 C  -2.176005  -1.030205  0.000000
 N  -1.085124  -1.855826  0.000000
 H  3.172571  -0.522367  0.000000
 H  -3.181128  -1.419331  0.000000
 H  -1.085122  -2.863359  0.000000
 H  0.807093  3.296715  0.000000
 H  -0.876946  2.835639  0.000000
 N  1.404328  -2.588361  3.299999
 C  1.039157  -1.288247  3.299999
 N  -0.259578  -0.972544  3.299999
 C  -0.607363  0.329661  3.299999
 N  0.183643  1.404114  3.299999
 C  1.472701  1.048489  3.299999
 C  1.986565  -0.249767  3.299999
 N  3.362783  -0.255430  3.299999
 C  3.676004  1.030205  3.299999
 N  2.585123  1.855827  3.299999
 H  -1.672571  0.522366  3.299999
 H  4.681128  1.419332  3.299999
 H  2.585121  2.863360  3.299999
 H  0.692908  -3.296716  3.299999
 H  2.376947  -2.835638  3.299999
30
adenine dimer 54
 N  0.095673  2.588361  0.000000
 C  0.460844  1.288246  0.000000
 N  1.759578  0.972543  0.000000
 C  2.107363  -0.329661  0.000000
 N  1.316357  -1.404115  0.000000
 C  0.027299  -1.048489  0.000000
 C  -0.486565  0.249767  0.000000
 N  -1.862783  0.255430  0.000000
 C  -2.176005  -1.030205  0.000000
 N  -1.085124  -1.855826  0.000000
 H  3.172571  -0.522367  0.000000
 H  -3.181128  -1.419331  0.000000
 H  -1.085122  -2.863359  0.000000
 H  0.807093  3.296715  0.000000
 H  -0.876946  2.835639  0.000000
 N  1.404328  -2.588361  3.399999
 C  1.039157  -1.288247  3.399999
 N  -0.259578  -0.972544  3.399999
 C  -0.607363  0.329661  3.399999
 N  0.183643  1.404114  3.399999
 C  1.472701  1.048489  3.399999
 C  1.986565  -0.249767  3.399999
 N  3.362783  -0.255430  3.399999
 C  3.676004  1.030205  3.399999
 N  2.585123  1.855827  3.399999
 H  -1.672571  0.522366  3.399999
 H  4.681128  1.419332  3.399999
 H  2.585121  2.863360  3.399999
 H  0.692908  -3.296716  3.399999
 H  2.376947  -2.835638  3.399999
30
adenine dimer 55
 N  0.095673  2.588361  0.000000
 C  0.460844  1.288246  0.000000
 N  1.759578  0.972543  0.000000
 C  2.107363  -0.329661  0.000000
 N  1.316357  -1.404115  0.000000
 C  0.027299  -1.048489  0.000000
 C  -0.486565  0.249767  0.000000
 N  -1.862783  0.255430  0.000000
 C  -2.176005  -1.030205  0.000000
 N  -1.085124  -1.855826  0.000000
 H  3.172571  -0.522367  0.000000
 H  -3.181128  -1.419331  0.000000
 H  -1.085122  -2.863359  0.000000
 H  0.807093  3.296715  0.000000
 H  -0.876946  2.835639  0.000000
 N  1.404328  -2.588361  3.499999
 C  1.039157  -1.288247  3.499999
 N  -0.259578  -0.972544  3.499999
 C  -0.607363  0.329661  3.499999
 N  0.183643  1.404114  3.499999
 C  1.472701  1.048489  3.499999
 C  1.986565  -0.249767  3.499999
 N  3.362783  -0.255430  3.499999
 C  3.676004  1.030205  3.499999
 N  2.585123  1.855827  3.499999
 H  -1.672571  0.522366  3.499999
 H  4.681128  1.419332  3.499999
 H  2.585121  2.863360  3.499999
 H  0.692908  -3.296716  3.499999
 H  2.376947  -2.835638  3.499999
30
adenine dimer 56
 N  0.095673  2.588361  0.000000
 C  0.460844  1.288246  0.000000
 N  1.759578  0.972543  0.000000
 C  2.107363  -0.329661  0.000000
 N  1.316357  -1.404115  0.000000
 C  0.027299  -1.048489  0.000000
 C  -0.486565  0.249767  0.000000
 N  -1.862783  0.255430  0.000000
 C  -2.176005  -1.030205  0.000000
 N  -1.085124  -1.855826  0.000000
 H  3.172571  -0.522367  0.000000
 H  -3.181128  -1.419331  0.000000
 H  -1.085122  -2.863359  0.000000
 H  0.807093  3.296715  0.000000
 H  -0.876946  2.835639  0.000000
 N  1.404328  -2.588361  3.599999
 C  1.039157  -1.288247  3.599999
 N  -0.259578  -0.972544  3.599999
 C  -0.607363  0.329661  3.599999
 N  0.183643  1.404114  3.599999
 C  1.472701  1.048489  3.599999
 C  1.986565  -0.249767  3.599999
 N  3.362783  -0.255430  3.599999
 C  3.676004  1.030205  3.599999
 N  2.585123  1.855827  3.599999
 H  -1.672571  0.522366  3.599999
 H  4.681128  1.419332  3.599999
 H  2.585121  2.863360  3.599999
 H  0.692908  -3.296716  3.599999
 H  2.376947  -2.835638  3.599999
30
adenine dimer 57
 N  0.095673  2.588361  0.000000
 C  0.460844  1.288246  0.000000
 N  1.759578  0.972543  0.000000
 C  2.107363  -0.329661  0.000000
 N  1.316357  -1.404115  0.000000
 C  0.027299  -1.048489  0.000000
 C  -0.486565  0.249767  0.000000
 N  -1.862783  0.255430  0.000000
 C  -2.176005  -1.030205  0.000000
 N  -1.085124  -1.855826  0.000000
 H  3.172571  -0.522367  0.000000
 H  -3.181128  -1.419331  0.000000
 H  -1.085122  -2.863359  0.000000
 H  0.807093  3.296715  0.000000
 H  -0.876946  2.835639  0.000000
 N  1.404328  -2.588361  3.699999
 C  1.039157  -1.288247  3.699999
 N  -0.259578  -0.972544  3.699999
 C  -0.607363  0.329661  3.699999
 N  0.183643  1.404114  3.699999
 C  1.472701  1.048489  3.699999
 C  1.986565  -0.249767  3.699999
 N  3.362783  -0.255430  3.699999
 C  3.676004  1.030205  3.699999
 N  2.585123  1.855827  3.699999
 H  -1.672571  0.522366  3.699999
 H  4.681128  1.419332  3.699999
 H  2.585121  2.863360  3.699999
 H  0.692908  -3.296716  3.699999
 H  2.376947  -2.835638  3.699999
30
adenine dimer 58
 N  0.095673  2.588361  0.000000
 C  0.460844  1.288246  0.000000
 N  1.759578  0.972543  0.000000
 C  2.107363  -0.329661  0.000000
 N  1.316357  -1.404115  0.000000
 C  0.027299  -1.048489  0.000000
 C  -0.486565  0.249767  0.000000
 N  -1.862783  0.255430  0.000000
 C  -2.176005  -1.030205  0.000000
 N  -1.085124  -1.855826  0.000000
 H  3.172571  -0.522367  0.000000
 H  -3.181128  -1.419331  0.000000
 H  -1.085122  -2.863359  0.000000
 H  0.807093  3.296715  0.000000
 H  -0.876946  2.835639  0.000000
 N  1.404328  -2.588361  3.799999
 C  1.039157  -1.288247  3.799999
 N  -0.259578  -0.972544  3.799999
 C  -0.607363  0.329661  3.799999
 N  0.183643  1.404114  3.799999
 C  1.472701  1.048489  3.799999
 C  1.986565  -0.249767  3.799999
 N  3.362783  -0.255430  3.799999
 C  3.676004  1.030205  3.799999
 N  2.585123  1.855827  3.799999
 H  -1.672571  0.522366  3.799999
 H  4.681128  1.419332  3.799999
 H  2.585121  2.863360  3.799999
 H  0.692908  -3.296716  3.799999
 H  2.376947  -2.835638  3.799999
30
adenine dimer 59
 N  0.095673  2.588361  0.000000
 C  0.460844  1.288246  0.000000
 N  1.759578  0.972543  0.000000
 C  2.107363  -0.329661  0.000000
 N  1.316357  -1.404115  0.000000
 C  0.027299  -1.048489  0.000000
 C  -0.486565  0.249767  0.000000
 N  -1.862783  0.255430  0.000000
 C  -2.176005  -1.030205  0.000000
 N  -1.085124  -1.855826  0.000000
 H  3.172571  -0.522367  0.000000
 H  -3.181128  -1.419331  0.000000
 H  -1.085122  -2.863359  0.000000
 H  0.807093  3.296715  0.000000
 H  -0.876946  2.835639  0.000000
 N  1.404328  -2.588361  3.899999
 C  1.039157  -1.288247  3.899999
 N  -0.259578  -0.972544  3.899999
 C  -0.607363  0.329661  3.899999
 N  0.183643  1.404114  3.899999
 C  1.472701  1.048489  3.899999
 C  1.986565  -0.249767  3.899999
 N  3.362783  -0.255430  3.899999
 C  3.676004  1.030205  3.899999
 N  2.585123  1.855827  3.899999
 H  -1.672571  0.522366  3.899999
 H  4.681128  1.419332  3.899999
 H  2.585121  2.863360  3.899999
 H  0.692908  -3.296716  3.899999
 H  2.376947  -2.835638  3.899999
30
adenine dimer 60
 N  0.095673  2.588361  0.000000
 C  0.460844  1.288246  0.000000
 N  1.759578  0.972543  0.000000
 C  2.107363  -0.329661  0.000000
 N  1.316357  -1.404115  0.000000
 C  0.027299  -1.048489  0.000000
 C  -0.486565  0.249767  0.000000
 N  -1.862783  0.255430  0.000000
 C  -2.176005  -1.030205  0.000000
 N  -1.085124  -1.855826  0.000000
 H  3.172571  -0.522367  0.000000
 H  -3.181128  -1.419331  0.000000
 H  -1.085122  -2.863359  0.000000
 H  0.807093  3.296715  0.000000
 H  -0.876946  2.835639  0.000000
 N  1.404328  -2.588361  3.999999
 C  1.039157  -1.288247  3.999999
 N  -0.259578  -0.972544  3.999999
 C  -0.607363  0.329661  3.999999
 N  0.183643  1.404114  3.999999
 C  1.472701  1.048489  3.999999
 C  1.986565  -0.249767  3.999999
 N  3.362783  -0.255430  3.999999
 C  3.676004  1.030205  3.999999
 N  2.585123  1.855827  3.999999
 H  -1.672571  0.522366  3.999999
 H  4.681128  1.419332  3.999999
 H  2.585121  2.863360  3.999999
 H  0.692908  -3.296716  3.999999
 H  2.376947  -2.835638  3.999999
30
adenine dimer 61
 N  0.095673  2.588361  0.000000
 C  0.460844  1.288246  0.000000
 N  1.759578  0.972543  0.000000
 C  2.107363  -0.329661  0.000000
 N  1.316357  -1.404115  0.000000
 C  0.027299  -1.048489  0.000000
 C  -0.486565  0.249767  0.000000
 N  -1.862783  0.255430  0.000000
 C  -2.176005  -1.030205  0.000000
 N  -1.085124  -1.855826  0.000000
 H  3.172571  -0.522367  0.000000
 H  -3.181128  -1.419331  0.000000
 H  -1.085122  -2.863359  0.000000
 H  0.807093  3.296715  0.000000
 H  -0.876946  2.835639  0.000000
 N  -1.595672  -2.588361  2.900000
 C  -1.960843  -1.288247  2.900000
 N  -3.259578  -0.972544  2.900000
 C  -3.607363  0.329661  2.900000
 N  -2.816358  1.404114  2.900000
 C  -1.527299  1.048489  2.900000
 C  -1.013435  -0.249767  2.900000
 N  0.362784  -0.255430  2.900000
 C  0.676004  1.030205  2.900000
 N  -0.414877  1.855827  2.900000
 H  -4.672571  0.522366  2.900000
 H  1.681128  1.419332  2.900000
 H  -0.414879  2.863360  2.900000
 H  -2.307092  -3.296716  2.900000
 H  -0.623053  -2.835638  2.900000
30
adenine dimer 62
 N  0.095673  2.588361  0.000000
 C  0.460844  1.288246  0.000000
 N  1.759578  0.972543  0.000000
 C  2.107363  -0.329661  0.000000
 N  1.316357  -1.404115  0.000000
 C  0.027299  -1.048489  0.000000
 C  -0.486565  0.249767  0.000000
 N  -1.862783  0.255430  0.000000
 C  -2.176005  -1.030205  0.000000
 N  -1.085124  -1.855826  0.000000
 H  3.172571  -0.522367  0.000000
 H  -3.181128  -1.419331  0.000000
 H  -1.085122  -2.863359  0.000000
 H  0.807093  3.296715  0.000000
 H  -0.876946  2.835639  0.000000
 N  -1.595672  -2.588361  3.000000
 C  -1.960843  -1.288247  3.000000
 N  -3.259578  -0.972544  3.000000
 C  -3.607363  0.329661  3.000000
 N  -2.816358  1.404114  3.000000
 C  -1.527299  1.048489  3.000000
 C  -1.013435  -0.249767  3.000000
 N  0.362784  -0.255430  3.000000
 C  0.676004  1.030205  3.000000
 N  -0.414877  1.855827  3.000000
 H  -4.672571  0.522366  3.000000
 H  1.681128  1.419332  3.000000
 H  -0.414879  2.863360  3.000000
 H  -2.307092  -3.296716  3.000000
 H  -0.623053  -2.835638  3.000000
30
adenine dimer 63
 N  0.095673  2.588361  0.000000
 C  0.460844  1.288246  0.000000
 N  1.759578  0.972543  0.000000
 C  2.107363  -0.329661  0.000000
 N  1.316357  -1.404115  0.000000
 C  0.027299  -1.048489  0.000000
 C  -0.486565  0.249767  0.000000
 N  -1.862783  0.255430  0.000000
 C  -2.176005  -1.030205  0.000000
 N  -1.085124  -1.855826  0.000000
 H  3.172571  -0.522367  0.000000
 H  -3.181128  -1.419331  0.000000
 H  -1.085122  -2.863359  0.000000
 H  0.807093  3.296715  0.000000
 H  -0.876946  2.835639  0.000000
 N  -1.595672  -2.588361  3.100000
 C  -1.960843  -1.288247  3.100000
 N  -3.259578  -0.972544  3.100000
 C  -3.607363  0.329661  3.100000
 N  -2.816358  1.404114  3.100000
 C  -1.527299  1.048489  3.100000
 C  -1.013435  -0.249767  3.100000
 N  0.362784  -0.255430  3.100000
 C  0.676004  1.030205  3.100000
 N  -0.414877  1.855827  3.100000
 H  -4.672571  0.522366  3.100000
 H  1.681128  1.419332  3.100000
 H  -0.414879  2.863360  3.100000
 H  -2.307092  -3.296716  3.100000
 H  -0.623053  -2.835638  3.100000
30
adenine dimer 64
 N  0.095673  2.588361  0.000000
 C  0.460844  1.288246  0.000000
 N  1.759578  0.972543  0.000000
 C  2.107363  -0.329661  0.000000
 N  1.316357  -1.404115  0.000000
 C  0.027299  -1.048489  0.000000
 C  -0.486565  0.249767  0.000000
 N  -1.862783  0.255430  0.000000
 C  -2.176005  -1.030205  0.000000
 N  -1.085124  -1.855826  0.000000
 H  3.172571  -0.522367  0.000000
 H  -3.181128  -1.419331  0.000000
 H  -1.085122  -2.863359  0.000000
 H  0.807093  3.296715  0.000000
 H  -0.876946  2.835639  0.000000
 N  -1.595672  -2.588361  3.200000
 C  -1.960843  -1.288247  3.200000
 N  -3.259578  -0.972544  3.200000
 C  -3.607363  0.329661  3.200000
 N  -2.816358  1.404114  3.200000
 C  -1.527299  1.048489  3.200000
 C  -1.013435  -0.249767  3.200000
 N  0.362784  -0.255430  3.200000
 C  0.676004  1.030205  3.200000
 N  -0.414877  1.855827  3.200000
 H  -4.672571  0.522366  3.200000
 H  1.681128  1.419332  3.200000
 H  -0.414879  2.863360  3.200000
 H  -2.307092  -3.296716  3.200000
 H  -0.623053  -2.835638  3.200000
30
adenine dimer 65
 N  0.095673  2.588361  0.000000
 C  0.460844  1.288246  0.000000
 N  1.759578  0.972543  0.000000
 C  2.107363  -0.329661  0.000000
 N  1.316357  -1.404115  0.000000
 C  0.027299  -1.048489  0.000000
 C  -0.486565  0.249767  0.000000
 N  -1.862783  0.255430  0.000000
 C  -2.176005  -1.030205  0.000000
 N  -1.085124  -1.855826  0.000000
 H  3.172571  -0.522367  0.000000
 H  -3.181128  -1.419331  0.000000
 H  -1.085122  -2.863359  0.000000
 H  0.807093  3.296715  0.000000
 H  -0.876946  2.835639  0.000000
 N  -1.595672  -2.588361  3.299999
 C  -1.960843  -1.288247  3.299999
 N  -3.259578  -0.972544  3.299999
 C  -3.607363  0.329661  3.299999
 N  -2.816358  1.404114  3.299999
 C  -1.527299  1.048489  3.299999
 C  -1.013435  -0.249767  3.299999
 N  0.362784  -0.255430  3.299999
 C  0.676004  1.030205  3.299999
 N  -0.414877  1.855827  3.299999
 H  -4.672571  0.522366  3.299999
 H  1.681128  1.419332  3.299999
 H  -0.414879  2.863360  3.299999
 H  -2.307092  -3.296716  3.299999
 H  -0.623053  -2.835638  3.299999
30
adenine dimer 66
 N  0.095673  2.588361  0.000000
 C  0.460844  1.288246  0.000000
 N  1.759578  0.972543  0.000000
 C  2.107363  -0.329661  0.000000
 N  1.316357  -1.404115  0.000000
 C  0.027299  -1.048489  0.000000
 C  -0.486565  0.249767  0.000000
 N  -1.862783  0.255430  0.000000
 C  -2.176005  -1.030205  0.000000
 N  -1.085124  -1.855826  0.000000
 H  3.172571  -0.522367  0.000000
 H  -3.181128  -1.419331  0.000000
 H  -1.085122  -2.863359  0.000000
 H  0.807093  3.296715  0.000000
 H  -0.876946  2.835639  0.000000
 N  -1.595672  -2.588361  3.399999
 C  -1.960843  -1.288247  3.399999
 N  -3.259578  -0.972544  3.399999
 C  -3.607363  0.329661  3.399999
 N  -2.816358  1.404114  3.399999
 C  -1.527299  1.048489  3.399999
 C  -1.013435  -0.249767  3.399999
 N  0.362784  -0.255430  3.399999
 C  0.676004  1.030205  3.399999
 N  -0.414877  1.855827  3.399999
 H  -4.672571  0.522366  3.399999
 H  1.681128  1.419332  3.399999
 H  -0.414879  2.863360  3.399999
 H  -2.307092  -3.296716  3.399999
 H  -0.623053  -2.835638  3.399999
30
adenine dimer 67
 N  0.095673  2.588361  0.000000
 C  0.460844  1.288246  0.000000
 N  1.759578  0.972543  0.000000
 C  2.107363  -0.329661  0.000000
 N  1.316357  -1.404115  0.000000
 C  0.027299  -1.048489  0.000000
 C  -0.486565  0.249767  0.000000
 N  -1.862783  0.255430  0.000000
 C  -2.176005  -1.030205  0.000000
 N  -1.085124  -1.855826  0.000000
 H  3.172571  -0.522367  0.000000
 H  -3.181128  -1.419331  0.000000
 H  -1.085122  -2.863359  0.000000
 H  0.807093  3.296715  0.000000
 H  -0.876946  2.835639  0.000000
 N  -1.595672  -2.588361  3.499999
 C  -1.960843  -1.288247  3.499999
 N  -3.259578  -0.972544  3.499999
 C  -3.607363  0.329661  3.499999
 N  -2.816358  1.404114  3.499999
 C  -1.527299  1.048489  3.499999
 C  -1.013435  -0.249767  3.499999
 N  0.362784  -0.255430  3.499999
 C  0.676004  1.030205  3.499999
 N  -0.414877  1.855827  3.499999
 H  -4.672571  0.522366  3.499999
 H  1.681128  1.419332  3.499999
 H  -0.414879  2.863360  3.499999
 H  -2.307092  -3.296716  3.499999
 H  -0.623053  -2.835638  3.499999
30
adenine dimer 68
 N  0.095673  2.588361  0.000000
 C  0.460844  1.288246  0.000000
 N  1.759578  0.972543  0.000000
 C  2.107363  -0.329661  0.000000
 N  1.316357  -1.404115  0.000000
 C  0.027299  -1.048489  0.000000
 C  -0.486565  0.249767  0.000000
 N  -1.862783  0.255430  0.000000
 C  -2.176005  -1.030205  0.000000
 N  -1.085124  -1.855826  0.000000
 H  3.172571  -0.522367  0.000000
 H  -3.181128  -1.419331  0.000000
 H  -1.085122  -2.863359  0.000000
 H  0.807093  3.296715  0.000000
 H  -0.876946  2.835639  0.000000
 N  -1.595672  -2.588361  3.599999
 C  -1.960843  -1.288247  3.599999
 N  -3.259578  -0.972544  3.599999
 C  -3.607363  0.329661  3.599999
 N  -2.816358  1.404114  3.599999
 C  -1.527299  1.048489  3.599999
 C  -1.013435  -0.249767  3.599999
 N  0.362784  -0.255430  3.599999
 C  0.676004  1.030205  3.599999
 N  -0.414877  1.855827  3.599999
 H  -4.672571  0.522366  3.599999
 H  1.681128  1.419332  3.599999
 H  -0.414879  2.863360  3.599999
 H  -2.307092  -3.296716  3.599999
 H  -0.623053  -2.835638  3.599999
30
adenine dimer 69
 N  0.095673  2.588361  0.000000
 C  0.460844  1.288246  0.000000
 N  1.759578  0.972543  0.000000
 C  2.107363  -0.329661  0.000000
 N  1.316357  -1.404115  0.000000
 C  0.027299  -1.048489  0.000000
 C  -0.486565  0.249767  0.000000
 N  -1.862783  0.255430  0.000000
 C  -2.176005  -1.030205  0.000000
 N  -1.085124  -1.855826  0.000000
 H  3.172571  -0.522367  0.000000
 H  -3.181128  -1.419331  0.000000
 H  -1.085122  -2.863359  0.000000
 H  0.807093  3.296715  0.000000
 H  -0.876946  2.835639  0.000000
 N  -1.595672  -2.588361  3.699999
 C  -1.960843  -1.288247  3.699999
 N  -3.259578  -0.972544  3.699999
 C  -3.607363  0.329661  3.699999
 N  -2.816358  1.404114  3.699999
 C  -1.527299  1.048489  3.699999
 C  -1.013435  -0.249767  3.699999
 N  0.362784  -0.255430  3.699999
 C  0.676004  1.030205  3.699999
 N  -0.414877  1.855827  3.699999
 H  -4.672571  0.522366  3.699999
 H  1.681128  1.419332  3.699999
 H  -0.414879  2.863360  3.699999
 H  -2.307092  -3.296716  3.699999
 H  -0.623053  -2.835638  3.699999
30
adenine dimer 70
 N  0.095673  2.588361  0.000000
 C  0.460844  1.288246  0.000000
 N  1.759578  0.972543  0.000000
 C  2.107363  -0.329661  0.000000
 N  1.316357  -1.404115  0.000000
 C  0.027299  -1.048489  0.000000
 C  -0.486565  0.249767  0.000000
 N  -1.862783  0.255430  0.000000
 C  -2.176005  -1.030205  0.000000
 N  -1.085124  -1.855826  0.000000
 H  3.172571  -0.522367  0.000000
 H  -3.181128  -1.419331  0.000000
 H  -1.085122  -2.863359  0.000000
 H  0.807093  3.296715  0.000000
 H  -0.876946  2.835639  0.000000
 N  -1.595672  -2.588361  3.799999
 C  -1.960843  -1.288247  3.799999
 N  -3.259578  -0.972544  3.799999
 C  -3.607363  0.329661  3.799999
 N  -2.816358  1.404114  3.799999
 C  -1.527299  1.048489  3.799999
 C  -1.013435  -0.249767  3.799999
 N  0.362784  -0.255430  3.799999
 C  0.676004  1.030205  3.799999
 N  -0.414877  1.855827  3.799999
 H  -4.672571  0.522366  3.799999
 H  1.681128  1.419332  3.799999
 H  -0.414879  2.863360  3.799999
 H  -2.307092  -3.296716  3.799999
 H  -0.623053  -2.835638  3.799999
30
adenine dimer 71
 N  0.095673  2.588361  0.000000
 C  0.460844  1.288246  0.000000
 N  1.759578  0.972543  0.000000
 C  2.107363  -0.329661  0.000000
 N  1.316357  -1.404115  0.000000
 C  0.027299  -1.048489  0.000000
 C  -0.486565  0.249767  0.000000
 N  -1.862783  0.255430  0.000000
 C  -2.176005  -1.030205  0.000000
 N  -1.085124  -1.855826  0.000000
 H  3.172571  -0.522367  0.000000
 H  -3.181128  -1.419331  0.000000
 H  -1.085122  -2.863359  0.000000
 H  0.807093  3.296715  0.000000
 H  -0.876946  2.835639  0.000000
 N  -1.595672  -2.588361  3.899999
 C  -1.960843  -1.288247  3.899999
 N  -3.259578  -0.972544  3.899999
 C  -3.607363  0.329661  3.899999
 N  -2.816358  1.404114  3.899999
 C  -1.527299  1.048489  3.899999
 C  -1.013435  -0.249767  3.899999
 N  0.362784  -0.255430  3.899999
 C  0.676004  1.030205  3.899999
 N  -0.414877  1.855827  3.899999
 H  -4.672571  0.522366  3.899999
 H  1.681128  1.419332  3.899999
 H  -0.414879  2.863360  3.899999
 H  -2.307092  -3.296716  3.899999
 H  -0.623053  -2.835638  3.899999
30
adenine dimer 72
 N  0.095673  2.588361  0.000000
 C  0.460844  1.288246  0.000000
 N  1.759578  0.972543  0.000000
 C  2.107363  -0.329661  0.000000
 N  1.316357  -1.404115  0.000000
 C  0.027299  -1.048489  0.000000
 C  -0.486565  0.249767  0.000000
 N  -1.862783  0.255430  0.000000
 C  -2.176005  -1.030205  0.000000
 N  -1.085124  -1.855826  0.000000
 H  3.172571  -0.522367  0.000000
 H  -3.181128  -1.419331  0.000000
 H  -1.085122  -2.863359  0.000000
 H  0.807093  3.296715  0.000000
 H  -0.876946  2.835639  0.000000
 N  -1.595672  -2.588361  3.999999
 C  -1.960843  -1.288247  3.999999
 N  -3.259578  -0.972544  3.999999
 C  -3.607363  0.329661  3.999999
 N  -2.816358  1.404114  3.999999
 C  -1.527299  1.048489  3.999999
 C  -1.013435  -0.249767  3.999999
 N  0.362784  -0.255430  3.999999
 C  0.676004  1.030205  3.999999
 N  -0.414877  1.855827  3.999999
 H  -4.672571  0.522366  3.999999
 H  1.681128  1.419332  3.999999
 H  -0.414879  2.863360  3.999999
 H  -2.307092  -3.296716  3.999999
 H  -0.623053  -2.835638  3.999999
30
adenine dimer 73
 N  0.095673  2.588361  0.000000
 C  0.460844  1.288246  0.000000
 N  1.759578  0.972543  0.000000
 C  2.107363  -0.329661  0.000000
 N  1.316357  -1.404115  0.000000
 C  0.027299  -1.048489  0.000000
 C  -0.486565  0.249767  0.000000
 N  -1.862783  0.255430  0.000000
 C  -2.176005  -1.030205  0.000000
 N  -1.085124  -1.855826  0.000000
 H  3.172571  -0.522367  0.000000
 H  -3.181128  -1.419331  0.000000
 H  -1.085122  -2.863359  0.000000
 H  0.807093  3.296715  0.000000
 H  -0.876946  2.835639  0.000000
 N  -0.095672  -1.088361  2.900000
 C  -0.460843  0.211753  2.900000
 N  -1.759578  0.527456  2.900000
 C  -2.107363  1.829661  2.900000
 N  -1.316357  2.904114  2.900000
 C  -0.027299  2.548489  2.900000
 C  0.486565  1.250233  2.900000
 N  1.862784  1.244570  2.900000
 C  2.176004  2.530205  2.900000
 N  1.085123  3.355827  2.900000
 H  -3.172571  2.022366  2.900000
 H  3.181128  2.919332  2.900000
 H  1.085121  4.363359  2.900000
 H  -0.807092  -1.796716  2.900000
 H  0.876947  -1.335638  2.900000
30
adenine dimer 74
 N  0.095673  2.588361  0.000000
 C  0.460844  1.288246  0.000000
 N  1.759578  0.972543  0.000000
 C  2.107363  -0.329661  0.000000
 N  1.316357  -1.404115  0.000000
 C  0.027299  -1.048489  0.000000
 C  -0.486565  0.249767  0.000000
 N  -1.862783  0.255430  0.000000
 C  -2.176005  -1.030205  0.000000
 N  -1.085124  -1.855826  0.000000
 H  3.172571  -0.522367  0.000000
 H  -3.181128  -1.419331  0.000000
 H  -1.085122  -2.863359  0.000000
 H  0.807093  3.296715  0.000000
 H  -0.876946  2.835639  0.000000
 N  -0.095672  -1.088361  3.000000
 C  -0.460843  0.211753  3.000000
 N  -1.759578  0.527456  3.000000
 C  -2.107363  1.829661  3.000000
 N  -1.316357  2.904114  3.000000
 C  -0.027299  2.548489  3.000000
 C  0.486565  1.250233  3.000000
 N  1.862784  1.244570  3.000000
 C  2.176004  2.530205  3.000000
 N  1.085123  3.355827  3.000000
 H  -3.172571  2.022366  3.000000
 H  3.181128  2.919332  3.000000
 H  1.085121  4.363359  3.000000
 H  -0.807092  -1.796716  3.000000
 H  0.876947  -1.335638  3.000000
30
adenine dimer 75
 N  0.095673  2.588361  0.000000
 C  0.460844  1.288246  0.000000
 N  1.759578  0.972543  0.000000
 C  2.107363  -0.329661  0.000000
 N  1.316357  -1.404115  0.000000
 C  0.027299  -1.048489  0.000000
 C  -0.486565  0.249767  0.000000
 N  -1.862783  0.255430  0.000000
 C  -2.176005  -1.030205  0.000000
 N  -1.085124  -1.855826  0.000000
 H  3.172571  -0.522367  0.000000
 H  -3.181128  -1.419331  0.000000
 H  -1.085122  -2.863359  0.000000
 H  0.807093  3.296715  0.000000
 H  -0.876946  2.835639  0.000000
 N  -0.095672  -1.088361  3.100000
 C  -0.460843  0.211753  3.100000
 N  -1.759578  0.527456  3.100000
 C  -2.107363  1.829661  3.100000
 N  -1.316357  2.904114  3.100000
 C  -0.027299  2.548489  3.100000
 C  0.486565  1.250233  3.100000
 N  1.862784  1.244570  3.100000
 C  2.176004  2.530205  3.100000
 N  1.085123  3.355827  3.100000
 H  -3.172571  2.022366  3.100000
 H  3.181128  2.919332  3.100000
 H  1.085121  4.363359  3.100000
 H  -0.807092  -1.796716  3.100000
 H  0.876947  -1.335638  3.100000
30
adenine dimer 76
 N  0.095673  2.588361  0.000000
 C  0.460844  1.288246  0.000000
 N  1.759578  0.972543  0.000000
 C  2.107363  -0.329661  0.000000
 N  1.316357  -1.404115  0.000000
 C  0.027299  -1.048489  0.000000
 C  -0.486565  0.249767  0.000000
 N  -1.862783  0.255430  0.000000
 C  -2.176005  -1.030205  0.000000
 N  -1.085124  -1.855826  0.000000
 H  3.172571  -0.522367  0.000000
 H  -3.181128  -1.419331  0.000000
 H  -1.085122  -2.863359  0.000000
 H  0.807093  3.296715  0.000000
 H  -0.876946  2.835639  0.000000
 N  -0.095672  -1.088361  3.200000
 C  -0.460843  0.211753  3.200000
 N  -1.759578  0.527456  3.200000
 C  -2.107363  1.829661  3.200000
 N  -1.316357  2.904114  3.200000
 C  -0.027299  2.548489  3.200000
 C  0.486565  1.250233  3.200000
 N  1.862784  1.244570  3.200000
 C  2.176004  2.530205  3.200000
 N  1.085123  3.355827  3.200000
 H  -3.172571  2.022366  3.200000
 H  3.181128  2.919332  3.200000
 H  1.085121  4.363359  3.200000
 H  -0.807092  -1.796716  3.200000
 H  0.876947  -1.335638  3.200000
30
adenine dimer 77
 N  0.095673  2.588361  0.000000
 C  0.460844  1.288246  0.000000
 N  1.759578  0.972543  0.000000
 C  2.107363  -0.329661  0.000000
 N  1.316357  -1.404115  0.000000
 C  0.027299  -1.048489  0.000000
 C  -0.486565  0.249767  0.000000
 N  -1.862783  0.255430  0.000000
 C  -2.176005  -1.030205  0.000000
 N  -1.085124  -1.855826  0.000000
 H  3.172571  -0.522367  0.000000
 H  -3.181128  -1.419331  0.000000
 H  -1.085122  -2.863359  0.000000
 H  0.807093  3.296715  0.000000
 H  -0.876946  2.835639  0.000000
 N  -0.095672  -1.088361  3.299999
 C  -0.460843  0.211753  3.299999
 N  -1.759578  0.527456  3.299999
 C  -2.107363  1.829661  3.299999
 N  -1.316357  2.904114  3.299999
 C  -0.027299  2.548489  3.299999
 C  0.486565  1.250233  3.299999
 N  1.862784  1.244570  3.299999
 C  2.176004  2.530205  3.299999
 N  1.085123  3.355827  3.299999
 H  -3.172571  2.022366  3.299999
 H  3.181128  2.919332  3.299999
 H  1.085121  4.363359  3.299999
 H  -0.807092  -1.796716  3.299999
 H  0.876947  -1.335638  3.299999
30
adenine dimer 78
 N  0.095673  2.588361  0.000000
 C  0.460844  1.288246  0.000000
 N  1.759578  0.972543  0.000000
 C  2.107363  -0.329661  0.000000
 N  1.316357  -1.404115  0.000000
 C  0.027299  -1.048489  0.000000
 C  -0.486565  0.249767  0.000000
 N  -1.862783  0.255430  0.000000
 C  -2.176005  -1.030205  0.000000
 N  -1.085124  -1.855826  0.000000
 H  3.172571  -0.522367  0.000000
 H  -3.181128  -1.419331  0.000000
 H  -1.085122  -2.863359  0.000000
 H  0.807093  3.296715  0.000000
 H  -0.876946  2.835639  0.000000
 N  -0.095672  -1.088361  3.399999
 C  -0.460843  0.211753  3.399999
 N  -1.759578  0.527456  3.399999
 C  -2.107363  1.829661  3.399999
 N  -1.316357  2.904114  3.399999
 C  -0.027299  2.548489  3.399999
 C  0.486565  1.250233  3.399999
 N  1.862784  1.244570  3.399999
 C  2.176004  2.530205  3.399999
 N  1.085123  3.355827  3.399999
 H  -3.172571  2.022366  3.399999
 H  3.181128  2.919332  3.399999
 H  1.085121  4.363359  3.399999
 H  -0.807092  -1.796716  3.399999
 H  0.876947  -1.335638  3.399999
30
adenine dimer 79
 N  0.095673  2.588361  0.000000
 C  0.460844  1.288246  0.000000
 N  1.759578  0.972543  0.000000
 C  2.107363  -0.329661  0.000000
 N  1.316357  -1.404115  0.000000
 C  0.027299  -1.048489  0.000000
 C  -0.486565  0.249767  0.000000
 N  -1.862783  0.255430  0.000000
 C  -2.176005  -1.030205  0.000000
 N  -1.085124  -1.855826  0.000000
 H  3.172571  -0.522367  0.000000
 H  -3.181128  -1.419331  0.000000
 H  -1.085122  -2.863359  0.000000
 H  0.807093  3.296715  0.000000
 H  -0.876946  2.835639  0.000000
 N  -0.095672  -1.088361  3.499999
 C  -0.460843  0.211753  3.499999
 N  -1.759578  0.527456  3.499999
 C  -2.107363  1.829661  3.499999
 N  -1.316357  2.904114  3.499999
 C  -0.027299  2.548489  3.499999
 C  0.486565  1.250233  3.499999
 N  1.862784  1.244570  3.499999
 C  2.176004  2.530205  3.499999
 N  1.085123  3.355827  3.499999
 H  -3.172571  2.022366  3.499999
 H  3.181128  2.919332  3.499999
 H  1.085121  4.363359  3.499999
 H  -0.807092  -1.796716  3.499999
 H  0.876947  -1.335638  3.499999
30
adenine dimer 80
 N  0.095673  2.588361  0.000000
 C  0.460844  1.288246  0.000000
 N  1.759578  0.972543  0.000000
 C  2.107363  -0.329661  0.000000
 N  1.316357  -1.404115  0.000000
 C  0.027299  -1.048489  0.000000
 C  -0.486565  0.249767  0.000000
 N  -1.862783  0.255430  0.000000
 C  -2.176005  -1.030205  0.000000
 N  -1.085124  -1.855826  0.000000
 H  3.172571  -0.522367  0.000000
 H  -3.181128  -1.419331  0.000000
 H  -1.085122  -2.863359  0.000000
 H  0.807093  3.296715  0.000000
 H  -0.876946  2.835639  0.000000
 N  -0.095672  -1.088361  3.599999
 C  -0.460843  0.211753  3.599999
 N  -1.759578  0.527456  3.599999
 C  -2.107363  1.829661  3.599999
 N  -1.316357  2.904114  3.599999
 C  -0.027299  2.548489  3.599999
 C  0.486565  1.250233  3.599999
 N  1.862784  1.244570  3.599999
 C  2.176004  2.530205  3.599999
 N  1.085123  3.355827  3.599999
 H  -3.172571  2.022366  3.599999
 H  3.181128  2.919332  3.599999
 H  1.085121  4.363359  3.599999
 H  -0.807092  -1.796716  3.599999
 H  0.876947  -1.335638  3.599999
30
adenine dimer 81
 N  0.095673  2.588361  0.000000
 C  0.460844  1.288246  0.000000
 N  1.759578  0.972543  0.000000
 C  2.107363  -0.329661  0.000000
 N  1.316357  -1.404115  0.000000
 C  0.027299  -1.048489  0.000000
 C  -0.486565  0.249767  0.000000
 N  -1.862783  0.255430  0.000000
 C  -2.176005  -1.030205  0.000000
 N  -1.085124  -1.855826  0.000000
 H  3.172571  -0.522367  0.000000
 H  -3.181128  -1.419331  0.000000
 H  -1.085122  -2.863359  0.000000
 H  0.807093  3.296715  0.000000
 H  -0.876946  2.835639  0.000000
 N  -0.095672  -1.088361  3.699999
 C  -0.460843  0.211753  3.699999
 N  -1.759578  0.527456  3.699999
 C  -2.107363  1.829661  3.699999
 N  -1.316357  2.904114  3.699999
 C  -0.027299  2.548489  3.699999
 C  0.486565  1.250233  3.699999
 N  1.862784  1.244570  3.699999
 C  2.176004  2.530205  3.699999
 N  1.085123  3.355827  3.699999
 H  -3.172571  2.022366  3.699999
 H  3.181128  2.919332  3.699999
 H  1.085121  4.363359  3.699999
 H  -0.807092  -1.796716  3.699999
 H  0.876947  -1.335638  3.699999
30
adenine dimer 82
 N  0.095673  2.588361  0.000000
 C  0.460844  1.288246  0.000000
 N  1.759578  0.972543  0.000000
 C  2.107363  -0.329661  0.000000
 N  1.316357  -1.404115  0.000000
 C  0.027299  -1.048489  0.000000
 C  -0.486565  0.249767  0.000000
 N  -1.862783  0.255430  0.000000
 C  -2.176005  -1.030205  0.000000
 N  -1.085124  -1.855826  0.000000
 H  3.172571  -0.522367  0.000000
 H  -3.181128  -1.419331  0.000000
 H  -1.085122  -2.863359  0.000000
 H  0.807093  3.296715  0.000000
 H  -0.876946  2.835639  0.000000
 N  -0.095672  -1.088361  3.799999
 C  -0.460843  0.211753  3.799999
 N  -1.759578  0.527456  3.799999
 C  -2.107363  1.829661  3.799999
 N  -1.316357  2.904114  3.799999
 C  -0.027299  2.548489  3.799999
 C  0.486565  1.250233  3.799999
 N  1.862784  1.244570  3.799999
 C  2.176004  2.530205  3.799999
 N  1.085123  3.355827  3.799999
 H  -3.172571  2.022366  3.799999
 H  3.181128  2.919332  3.799999
 H  1.085121  4.363359  3.799999
 H  -0.807092  -1.796716  3.799999
 H  0.876947  -1.335638  3.799999
30
adenine dimer 83
 N  0.095673  2.588361  0.000000
 C  0.460844  1.288246  0.000000
 N  1.759578  0.972543  0.000000
 C  2.107363  -0.329661  0.000000
 N  1.316357  -1.404115  0.000000
 C  0.027299  -1.048489  0.000000
 C  -0.486565  0.249767  0.000000
 N  -1.862783  0.255430  0.000000
 C  -2.176005  -1.030205  0.000000
 N  -1.085124  -1.855826  0.000000
 H  3.172571  -0.522367  0.000000
 H  -3.181128  -1.419331  0.000000
 H  -1.085122  -2.863359  0.000000
 H  0.807093  3.296715  0.000000
 H  -0.876946  2.835639  0.000000
 N  -0.095672  -1.088361  3.899999
 C  -0.460843  0.211753  3.899999
 N  -1.759578  0.527456  3.899999
 C  -2.107363  1.829661  3.899999
 N  -1.316357  2.904114  3.899999
 C  -0.027299  2.548489  3.899999
 C  0.486565  1.250233  3.899999
 N  1.862784  1.244570  3.899999
 C  2.176004  2.530205  3.899999
 N  1.085123  3.355827  3.899999
 H  -3.172571  2.022366  3.899999
 H  3.181128  2.919332  3.899999
 H  1.085121  4.363359  3.899999
 H  -0.807092  -1.796716  3.899999
 H  0.876947  -1.335638  3.899999
30
adenine dimer 84
 N  0.095673  2.588361  0.000000
 C  0.460844  1.288246  0.000000
 N  1.759578  0.972543  0.000000
 C  2.107363  -0.329661  0.000000
 N  1.316357  -1.404115  0.000000
 C  0.027299  -1.048489  0.000000
 C  -0.486565  0.249767  0.000000
 N  -1.862783  0.255430  0.000000
 C  -2.176005  -1.030205  0.000000
 N  -1.085124  -1.855826  0.000000
 H  3.172571  -0.522367  0.000000
 H  -3.181128  -1.419331  0.000000
 H  -1.085122  -2.863359  0.000000
 H  0.807093  3.296715  0.000000
 H  -0.876946  2.835639  0.000000
 N  -0.095672  -1.088361  3.999999
 C  -0.460843  0.211753  3.999999
 N  -1.759578  0.527456  3.999999
 C  -2.107363  1.829661  3.999999
 N  -1.316357  2.904114  3.999999
 C  -0.027299  2.548489  3.999999
 C  0.486565  1.250233  3.999999
 N  1.862784  1.244570  3.999999
 C  2.176004  2.530205  3.999999
 N  1.085123  3.355827  3.999999
 H  -3.172571  2.022366  3.999999
 H  3.181128  2.919332  3.999999
 H  1.085121  4.363359  3.999999
 H  -0.807092  -1.796716  3.999999
 H  0.876947  -1.335638  3.999999
30
adenine dimer 85
 N  0.095673  2.588361  0.000000
 C  0.460844  1.288246  0.000000
 N  1.759578  0.972543  0.000000
 C  2.107363  -0.329661  0.000000
 N  1.316357  -1.404115  0.000000
 C  0.027299  -1.048489  0.000000
 C  -0.486565  0.249767  0.000000
 N  -1.862783  0.255430  0.000000
 C  -2.176005  -1.030205  0.000000
 N  -1.085124  -1.855826  0.000000
 H  3.172571  -0.522367  0.000000
 H  -3.181128  -1.419331  0.000000
 H  -1.085122  -2.863359  0.000000
 H  0.807093  3.296715  0.000000
 H  -0.876946  2.835639  0.000000
 N  -0.095672  -4.088361  2.900000
 C  -0.460843  -2.788247  2.900000
 N  -1.759578  -2.472544  2.900000
 C  -2.107363  -1.170339  2.900000
 N  -1.316357  -0.095886  2.900000
 C  -0.027299  -0.451511  2.900000
 C  0.486565  -1.749767  2.900000
 N  1.862784  -1.755430  2.900000
 C  2.176004  -0.469795  2.900000
 N  1.085123  0.355827  2.900000
 H  -3.172571  -0.977634  2.900000
 H  3.181128  -0.080668  2.900000
 H  1.085121  1.363360  2.900000
 H  -0.807092  -4.796716  2.900000
 H  0.876947  -4.335638  2.900000
30
adenine dimer 86
 N  0.095673  2.588361  0.000000
 C  0.460844  1.288246  0.000000
 N  1.759578  0.972543  0.000000
 C  2.107363  -0.329661  0.000000
 N  1.316357  -1.404115  0.000000
 C  0.027299  -1.048489  0.000000
 C  -0.486565  0.249767  0.000000
 N  -1.862783  0.255430  0.000000
 C  -2.176005  -1.030205  0.000000
 N  -1.085124  -1.855826  0.000000
 H  3.172571  -0.522367  0.000000
 H  -3.181128  -1.419331  0.000000
 H  -1.085122  -2.863359  0.000000
 H  0.807093  3.296715  0.000000
 H  -0.876946  2.835639  0.000000
 N  -0.095672  -4.088361  3.000000
 C  -0.460843  -2.788247  3.000000
 N  -1.759578  -2.472544  3.000000
 C  -2.107363  -1.170339  3.000000
 N  -1.316357  -0.095886  3.000000
 C  -0.027299  -0.451511  3.000000
 C  0.486565  -1.749767  3.000000
 N  1.862784  -1.755430  3.000000
 C  2.176004  -0.469795  3.000000
 N  1.085123  0.355827  3.000000
 H  -3.172571  -0.977634  3.000000
 H  3.181128  -0.080668  3.000000
 H  1.085121  1.363360  3.000000
 H  -0.807092  -4.796716  3.000000
 H  0.876947  -4.335638  3.000000
30
adenine dimer 87
 N  0.095673  2.588361  0.000000
 C  0.460844  1.288246  0.000000
 N  1.759578  0.972543  0.000000
 C  2.107363  -0.329661  0.000000
 N  1.316357  -1.404115  0.000000
 C  0.027299  -1.048489  0.000000
 C  -0.486565  0.249767  0.000000
 N  -1.862783  0.255430  0.000000
 C  -2.176005  -1.030205  0.000000
 N  -1.085124  -1.855826  0.000000
 H  3.172571  -0.522367  0.000000
 H  -3.181128  -1.419331  0.000000
 H  -1.085122  -2.863359  0.000000
 H  0.807093  3.296715  0.000000
 H  -0.876946  2.835639  0.000000
 N  -0.095672  -4.088361  3.100000
 C  -0.460843  -2.788247  3.100000
 N  -1.759578  -2.472544  3.100000
 C  -2.107363  -1.170339  3.100000
 N  -1.316357  -0.095886  3.100000
 C  -0.027299  -0.451511  3.100000
 C  0.486565  -1.749767  3.100000
 N  1.862784  -1.755430  3.100000
 C  2.176004  -0.469795  3.100000
 N  1.085123  0.355827  3.100000
 H  -3.172571  -0.977634  3.100000
 H  3.181128  -0.080668  3.100000
 H  1.085121  1.363360  3.100000
 H  -0.807092  -4.796716  3.100000
 H  0.876947  -4.335638  3.100000
30
adenine dimer 88
 N  0.095673  2.588361  0.000000
 C  0.460844  1.288246  0.000000
 N  1.759578  0.972543  0.000000
 C  2.107363  -0.329661  0.000000
 N  1.316357  -1.404115  0.000000
 C  0.027299  -1.048489  0.000000
 C  -0.486565  0.249767  0.000000
 N  -1.862783  0.255430  0.000000
 C  -2.176005  -1.030205  0.000000
 N  -1.085124  -1.855826  0.000000
 H  3.172571  -0.522367  0.000000
 H  -3.181128  -1.419331  0.000000
 H  -1.085122  -2.863359  0.000000
 H  0.807093  3.296715  0.000000
 H  -0.876946  2.835639  0.000000
 N  -0.095672  -4.088361  3.200000
 C  -0.460843  -2.788247  3.200000
 N  -1.759578  -2.472544  3.200000
 C  -2.107363  -1.170339  3.200000
 N  -1.316357  -0.095886  3.200000
 C  -0.027299  -0.451511  3.200000
 C  0.486565  -1.749767  3.200000
 N  1.862784  -1.755430  3.200000
 C  2.176004  -0.469795  3.200000
 N  1.085123  0.355827  3.200000
 H  -3.172571  -0.977634  3.200000
 H  3.181128  -0.080668  3.200000
 H  1.085121  1.363360  3.200000
 H  -0.807092  -4.796716  3.200000
 H  0.876947  -4.335638  3.200000
30
adenine dimer 89
 N  0.095673  2.588361  0.000000
 C  0.460844  1.288246  0.000000
 N  1.759578  0.972543  0.000000
 C  2.107363  -0.329661  0.000000
 N  1.316357  -1.404115  0.000000
 C  0.027299  -1.048489  0.000000
 C  -0.486565  0.249767  0.000000
 N  -1.862783  0.255430  0.000000
 C  -2.176005  -1.030205  0.000000
 N  -1.085124  -1.855826  0.000000
 H  3.172571  -0.522367  0.000000
 H  -3.181128  -1.419331  0.000000
 H  -1.085122  -2.863359  0.000000
 H  0.807093  3.296715  0.000000
 H  -0.876946  2.835639  0.000000
 N  -0.095672  -4.088361  3.299999
 C  -0.460843  -2.788247  3.299999
 N  -1.759578  -2.472544  3.299999
 C  -2.107363  -1.170339  3.299999
 N  -1.316357  -0.095886  3.299999
 C  -0.027299  -0.451511  3.299999
 C  0.486565  -1.749767  3.299999
 N  1.862784  -1.755430  3.299999
 C  2.176004  -0.469795  3.299999
 N  1.085123  0.355827  3.299999
 H  -3.172571  -0.977634  3.299999
 H  3.181128  -0.080668  3.299999
 H  1.085121  1.363360  3.299999
 H  -0.807092  -4.796716  3.299999
 H  0.876947  -4.335638  3.299999
30
adenine dimer 90
 N  0.095673  2.588361  0.000000
 C  0.460844  1.288246  0.000000
 N  1.759578  0.972543  0.000000
 C  2.107363  -0.329661  0.000000
 N  1.316357  -1.404115  0.000000
 C  0.027299  -1.048489  0.000000
 C  -0.486565  0.249767  0.000000
 N  -1.862783  0.255430  0.000000
 C  -2.176005  -1.030205  0.000000
 N  -1.085124  -1.855826  0.000000
 H  3.172571  -0.522367  0.000000
 H  -3.181128  -1.419331  0.000000
 H  -1.085122  -2.863359  0.000000
 H  0.807093  3.296715  0.000000
 H  -0.876946  2.835639  0.000000
 N  -0.095672  -4.088361  3.399999
 C  -0.460843  -2.788247  3.399999
 N  -1.759578  -2.472544  3.399999
 C  -2.107363  -1.170339  3.399999
 N  -1.316357  -0.095886  3.399999
 C  -0.027299  -0.451511  3.399999
 C  0.486565  -1.749767  3.399999
 N  1.862784  -1.755430  3.399999
 C  2.176004  -0.469795  3.399999
 N  1.085123  0.355827  3.399999
 H  -3.172571  -0.977634  3.399999
 H  3.181128  -0.080668  3.399999
 H  1.085121  1.363360  3.399999
 H  -0.807092  -4.796716  3.399999
 H  0.876947  -4.335638  3.399999
30
adenine dimer 91
 N  0.095673  2.588361  0.000000
 C  0.460844  1.288246  0.000000
 N  1.759578  0.972543  0.000000
 C  2.107363  -0.329661  0.000000
 N  1.316357  -1.404115  0.000000
 C  0.027299  -1.048489  0.000000
 C  -0.486565  0.249767  0.000000
 N  -1.862783  0.255430  0.000000
 C  -2.176005  -1.030205  0.000000
 N  -1.085124  -1.855826  0.000000
 H  3.172571  -0.522367  0.000000
 H  -3.181128  -1.419331  0.000000
 H  -1.085122  -2.863359  0.000000
 H  0.807093  3.296715  0.000000
 H  -0.876946  2.835639  0.000000
 N  -0.095672  -4.088361  3.499999
 C  -0.460843  -2.788247  3.499999
 N  -1.759578  -2.472544  3.499999
 C  -2.107363  -1.170339  3.499999
 N  -1.316357  -0.095886  3.499999
 C  -0.027299  -0.451511  3.499999
 C  0.486565  -1.749767  3.499999
 N  1.862784  -1.755430  3.499999
 C  2.176004  -0.469795  3.499999
 N  1.085123  0.355827  3.499999
 H  -3.172571  -0.977634  3.499999
 H  3.181128  -0.080668  3.499999
 H  1.085121  1.363360  3.499999
 H  -0.807092  -4.796716  3.499999
 H  0.876947  -4.335638  3.499999
30
adenine dimer 92
 N  0.095673  2.588361  0.000000
 C  0.460844  1.288246  0.000000
 N  1.759578  0.972543  0.000000
 C  2.107363  -0.329661  0.000000
 N  1.316357  -1.404115  0.000000
 C  0.027299  -1.048489  0.000000
 C  -0.486565  0.249767  0.000000
 N  -1.862783  0.255430  0.000000
 C  -2.176005  -1.030205  0.000000
 N  -1.085124  -1.855826  0.000000
 H  3.172571  -0.522367  0.000000
 H  -3.181128  -1.419331  0.000000
 H  -1.085122  -2.863359  0.000000
 H  0.807093  3.296715  0.000000
 H  -0.876946  2.835639  0.000000
 N  -0.095672  -4.088361  3.599999
 C  -0.460843  -2.788247  3.599999
 N  -1.759578  -2.472544  3.599999
 C  -2.107363  -1.170339  3.599999
 N  -1.316357  -0.095886  3.599999
 C  -0.027299  -0.451511  3.599999
 C  0.486565  -1.749767  3.599999
 N  1.862784  -1.755430  3.599999
 C  2.176004  -0.469795  3.599999
 N  1.085123  0.355827  3.599999
 H  -3.172571  -0.977634  3.599999
 H  3.181128  -0.080668  3.599999
 H  1.085121  1.363360  3.599999
 H  -0.807092  -4.796716  3.599999
 H  0.876947  -4.335638  3.599999
30
adenine dimer 93
 N  0.095673  2.588361  0.000000
 C  0.460844  1.288246  0.000000
 N  1.759578  0.972543  0.000000
 C  2.107363  -0.329661  0.000000
 N  1.316357  -1.404115  0.000000
 C  0.027299  -1.048489  0.000000
 C  -0.486565  0.249767  0.000000
 N  -1.862783  0.255430  0.000000
 C  -2.176005  -1.030205  0.000000
 N  -1.085124  -1.855826  0.000000
 H  3.172571  -0.522367  0.000000
 H  -3.181128  -1.419331  0.000000
 H  -1.085122  -2.863359  0.000000
 H  0.807093  3.296715  0.000000
 H  -0.876946  2.835639  0.000000
 N  -0.095672  -4.088361  3.699999
 C  -0.460843  -2.788247  3.699999
 N  -1.759578  -2.472544  3.699999
 C  -2.107363  -1.170339  3.699999
 N  -1.316357  -0.095886  3.699999
 C  -0.027299  -0.451511  3.699999
 C  0.486565  -1.749767  3.699999
 N  1.862784  -1.755430  3.699999
 C  2.176004  -0.469795  3.699999
 N  1.085123  0.355827  3.699999
 H  -3.172571  -0.977634  3.699999
 H  3.181128  -0.080668  3.699999
 H  1.085121  1.363360  3.699999
 H  -0.807092  -4.796716  3.699999
 H  0.876947  -4.335638  3.699999
30
adenine dimer 94
 N  0.095673  2.588361  0.000000
 C  0.460844  1.288246  0.000000
 N  1.759578  0.972543  0.000000
 C  2.107363  -0.329661  0.000000
 N  1.316357  -1.404115  0.000000
 C  0.027299  -1.048489  0.000000
 C  -0.486565  0.249767  0.000000
 N  -1.862783  0.255430  0.000000
 C  -2.176005  -1.030205  0.000000
 N  -1.085124  -1.855826  0.000000
 H  3.172571  -0.522367  0.000000
 H  -3.181128  -1.419331  0.000000
 H  -1.085122  -2.863359  0.000000
 H  0.807093  3.296715  0.000000
 H  -0.876946  2.835639  0.000000
 N  -0.095672  -4.088361  3.799999
 C  -0.460843  -2.788247  3.799999
 N  -1.759578  -2.472544  3.799999
 C  -2.107363  -1.170339  3.799999
 N  -1.316357  -0.095886  3.799999
 C  -0.027299  -0.451511  3.799999
 C  0.486565  -1.749767  3.799999
 N  1.862784  -1.755430  3.799999
 C  2.176004  -0.469795  3.799999
 N  1.085123  0.355827  3.799999
 H  -3.172571  -0.977634  3.799999
 H  3.181128  -0.080668  3.799999
 H  1.085121  1.363360  3.799999
 H  -0.807092  -4.796716  3.799999
 H  0.876947  -4.335638  3.799999
30
adenine dimer 95
 N  0.095673  2.588361  0.000000
 C  0.460844  1.288246  0.000000
 N  1.759578  0.972543  0.000000
 C  2.107363  -0.329661  0.000000
 N  1.316357  -1.404115  0.000000
 C  0.027299  -1.048489  0.000000
 C  -0.486565  0.249767  0.000000
 N  -1.862783  0.255430  0.000000
 C  -2.176005  -1.030205  0.000000
 N  -1.085124  -1.855826  0.000000
 H  3.172571  -0.522367  0.000000
 H  -3.181128  -1.419331  0.000000
 H  -1.085122  -2.863359  0.000000
 H  0.807093  3.296715  0.000000
 H  -0.876946  2.835639  0.000000
 N  -0.095672  -4.088361  3.899999
 C  -0.460843  -2.788247  3.899999
 N  -1.759578  -2.472544  3.899999
 C  -2.107363  -1.170339  3.899999
 N  -1.316357  -0.095886  3.899999
 C  -0.027299  -0.451511  3.899999
 C  0.486565  -1.749767  3.899999
 N  1.862784  -1.755430  3.899999
 C  2.176004  -0.469795  3.899999
 N  1.085123  0.355827  3.899999
 H  -3.172571  -0.977634  3.899999
 H  3.181128  -0.080668  3.899999
 H  1.085121  1.363360  3.899999
 H  -0.807092  -4.796716  3.899999
 H  0.876947  -4.335638  3.899999
30
adenine dimer 96
 N  0.095673  2.588361  0.000000
 C  0.460844  1.288246  0.000000
 N  1.759578  0.972543  0.000000
 C  2.107363  -0.329661  0.000000
 N  1.316357  -1.404115  0.000000
 C  0.027299  -1.048489  0.000000
 C  -0.486565  0.249767  0.000000
 N  -1.862783  0.255430  0.000000
 C  -2.176005  -1.030205  0.000000
 N  -1.085124  -1.855826  0.000000
 H  3.172571  -0.522367  0.000000
 H  -3.181128  -1.419331  0.000000
 H  -1.085122  -2.863359  0.000000
 H  0.807093  3.296715  0.000000
 H  -0.876946  2.835639  0.000000
 N  -0.095672  -4.088361  3.999999
 C  -0.460843  -2.788247  3.999999
 N  -1.759578  -2.472544  3.999999
 C  -2.107363  -1.170339  3.999999
 N  -1.316357  -0.095886  3.999999
 C  -0.027299  -0.451511  3.999999
 C  0.486565  -1.749767  3.999999
 N  1.862784  -1.755430  3.999999
 C  2.176004  -0.469795  3.999999
 N  1.085123  0.355827  3.999999
 H  -3.172571  -0.977634  3.999999
 H  3.181128  -0.080668  3.999999
 H  1.085121  1.363360  3.999999
 H  -0.807092  -4.796716  3.999999
 H  0.876947  -4.335638  3.999999
30
adenine dimer 97
 N  0.095673  2.588361  0.000000
 C  0.460844  1.288246  0.000000
 N  1.759578  0.972543  0.000000
 C  2.107363  -0.329661  0.000000
 N  1.316357  -1.404115  0.000000
 C  0.027299  -1.048489  0.000000
 C  -0.486565  0.249767  0.000000
 N  -1.862783  0.255430  0.000000
 C  -2.176005  -1.030205  0.000000
 N  -1.085124  -1.855826  0.000000
 H  3.172571  -0.522367  0.000000
 H  -3.181128  -1.419331  0.000000
 H  -1.085122  -2.863359  0.000000
 H  0.807093  3.296715  0.000000
 H  -0.876946  2.835639  0.000000
 N  -1.211326  2.289423  3.300000
 C  -0.245021  1.346076  3.300000
 N  1.037567  1.722036  3.300000
 C  1.989860  0.768186  3.300000
 N  1.842056  -0.557820  3.300000
 C  0.547886  -0.894369  3.300000
 C  -0.546261  -0.026978  3.300000
 N  -1.740933  -0.710183  3.300000
 C  -1.369373  -1.980186  3.300000
 N  -0.011831  -2.149755  3.300000
 H  3.008710  1.133903  3.300000
 H  -2.045272  -2.819741  3.300000
 H  0.491937  -3.022303  3.300000
 H  -0.949395  3.258586  3.300000
 H  -2.177277  2.017262  3.300000
30
adenine dimer 98
 N  0.095673  2.588361  0.000000
 C  0.460844  1.288246  0.000000
 N  1.759578  0.972543  0.000000
 C  2.107363  -0.329661  0.000000
 N  1.316357  -1.404115  0.000000
 C  0.027299  -1.048489  0.000000
 C  -0.486565  0.249767  0.000000
 N  -1.862783  0.255430  0.000000
 C  -2.176005  -1.030205  0.000000
 N  -1.085124  -1.855826  0.000000
 H  3.172571  -0.522367  0.000000
 H  -3.181128  -1.419331  0.000000
 H  -1.085122  -2.863359  0.000000
 H  0.807093  3.296715  0.000000
 H  -0.876946  2.835639  0.000000
 N  -2.193750  1.377035  3.300000
 C  -0.885233  1.043225  3.300000
 N  0.037541  2.010111  3.300000
 C  1.339176  1.660199  3.300000
 N  1.874177  0.437942  3.300000
 C  0.921668  -0.500603  3.300000
 C  -0.459587  -0.296494  3.300000
 N  -1.152601  -1.485503  3.300000
 C  -0.195818  -2.399578  3.300000
 N  1.064631  -1.867658  3.300000
 H  2.038668  2.486344  3.300000
 H  -0.361387  -3.464603  3.300000
 H  1.937181  -2.371423  3.300000
 H  -2.451493  2.347321  3.300000
 H  -2.894208  0.658361  3.300000
30
adenine dimer 99
 N  0.095673  2.588361  0.000000
 C  0.460844  1.288246  0.000000
 N  1.759578  0.972543  0.000000
 C  2.107363  -0.329661  0.000000
 N  1.316357  -1.404115  0.000000
 C  0.027299  -1.048489  0.000000
 C  -0.486565  0.249767  0.000000
 N  -1.862783  0.255430  0.000000
 C  -2.176005  -1.030205  0.000000
 N  -1.085124  -1.855826  0.000000
 H  3.172571  -0.522367  0.000000
 H  -3.181128  -1.419331  0.000000
 H  -1.085122  -2.863359  0.000000
 H  0.807093  3.296715  0.000000
 H  -0.876946  2.835639  0.000000
 N  -2.588361  0.095672  3.300000
 C  -1.288247  0.460843  3.300000
 N  -0.972544  1.759578  3.300000
 C  0.329661  2.107363  3.300000
 N  1.404114  1.316357  3.300000
 C  1.048489  0.027299  3.300000
 C  -0.249767  -0.486565  3.300000
 N  -0.255430  -1.862784  3.300000
 C  1.030205  -2.176004  3.300000
 N  1.855827  -1.085123  3.300000
 H  0.522366  3.172571  3.300000
 H  1.419332  -3.181128  3.300000
 H  2.863359  -1.085121  3.300000
 H  -3.296716  0.807092  3.300000
 H  -2.835639  -0.876947  3.300000
30
adenine dimer 100
 N  0.095673  2.588361  0.000000
 C  0.460844  1.288246  0.000000
 N  1.759578  0.972543  0.000000
 C  2.107363  -0.329661  0.000000
 N  1.316357  -1.404115  0.000000
 C  0.027299  -1.048489  0.000000
 C  -0.486565  0.249767  0.000000
 N  -1.862783  0.255430  0.000000
 C  -2.176005  -1.030205  0.000000
 N  -1.085124  -1.855826  0.000000
 H  3.172571  -0.522367  0.000000
 H  -3.181128  -1.419331  0.000000
 H  -1.085122  -2.863359  0.000000
 H  0.807093  3.296715  0.000000
 H  -0.876946  2.835639  0.000000
 N  -2.289422  -1.211326  3.300000
 C  -1.346076  -0.245021  3.300000
 N  -1.722036  1.037567  3.300000
 C  -0.768187  1.989860  3.300000
 N  0.557820  1.842056  3.300000
 C  0.894369  0.547886  3.300000
 C  0.026978  -0.546261  3.300000
 N  0.710183  -1.740933  3.300000
 C  1.980186  -1.369372  3.300000
 N  2.149755  -0.011831  3.300000
 H  -1.133903  3.008710  3.300000
 H  2.819741  -2.045271  3.300000
 H  3.022303  0.491937  3.300000
 H  -3.258586  -0.949396  3.300000
 H  -2.017262  -2.177277  3.300000
30
adenine dimer 101
 N  0.095673  2.588361  0.000000
 C  0.460844  1.288246  0.000000
 N  1.759578  0.972543  0.000000
 C  2.107363  -0.329661  0.000000
 N  1.316357  -1.404115  0.000000
 C  0.027299  -1.048489  0.000000
 C  -0.486565  0.249767  0.000000
 N  -1.862783  0.255430  0.000000
 C  -2.176005  -1.030205  0.000000
 N  -1.085124  -1.855826  0.000000
 H  3.172571  -0.522367  0.000000
 H  -3.181128  -1.419331  0.000000
 H  -1.085122  -2.863359  0.000000
 H  0.807093  3.296715  0.000000
 H  -0.876946  2.835639  0.000000
 N  -1.377035  -2.193750  3.300000
 C  -1.043225  -0.885233  3.300000
 N  -2.010111  0.037542  3.300000
 C  -1.660199  1.339176  3.300000
 N  -0.437942  1.874177  3.300000
 C  0.500603  0.921668  3.300000
 C  0.296494  -0.459587  3.300000
 N  1.485503  -1.152601  3.300000
 C  2.399578  -0.195819  3.300000
 N  1.867658  1.064631  3.300000
 H  -2.486344  2.038668  3.300000
 H  3.464603  -0.361387  3.300000
 H  2.371423  1.937181  3.300000
 H  -2.347321  -2.451493  3.300000
 H  -0.658361  -2.894208  3.300000

Cartesian coordinates of the non-parallel dimers.

30
adenine dimer 102
 N  0.095673  2.588361  0.000000
 C  0.460844  1.288246  0.000000
 N  1.759578  0.972543  0.000000
 C  2.107363  -0.329661  0.000000
 N  1.316357  -1.404115  0.000000
 C  0.027299  -1.048489  0.000000
 C  -0.486565  0.249767  0.000000
 N  -1.862783  0.255430  0.000000
 C  -2.176005  -1.030205  0.000000
 N  -1.085124  -1.855826  0.000000
 H  3.172571  -0.522367  0.000000
 H  -3.181128  -1.419331  0.000000
 H  -1.085122  -2.863359  0.000000
 H  0.807093  3.296715  0.000000
 H  -0.876946  2.835639  0.000000
 N  -0.284070  -2.346152  2.439343
 C  -0.548282  -1.167848  3.043859
 N  -1.804118  -0.881724  3.400777
 C  -2.051054  0.298474  4.003144
 N  -1.193215  1.272259  4.312973
 C  0.050161  0.949954  3.941119
 C  0.460943  -0.226666  3.311556
 N  1.815838  -0.231798  3.070221
 C  2.218649  0.933383  3.550910
 N  1.204931  1.681650  4.083961
 H  -3.085938  0.473124  4.268319
 H  3.237059  1.286052  3.538325
 H  1.278869  2.594785  4.503294
 H  -1.036666  -2.988139  2.268064
 H  0.655625  -2.570261  2.167533
30
adenine dimer 103
 N  0.095673  2.588361  0.000000
 C  0.460844  1.288246  0.000000
 N  1.759578  0.972543  0.000000
 C  2.107363  -0.329661  0.000000
 N  1.316357  -1.404115  0.000000
 C  0.027299  -1.048489  0.000000
 C  -0.486565  0.249767  0.000000
 N  -1.862783  0.255430  0.000000
 C  -2.176005  -1.030205  0.000000
 N  -1.085124  -1.855826  0.000000
 H  3.172571  -0.522367  0.000000
 H  -3.181128  -1.419331  0.000000
 H  -1.085122  -2.863359  0.000000
 H  0.807093  3.296715  0.000000
 H  -0.876946  2.835639  0.000000
 N  -0.284070  -2.346152  2.539343
 C  -0.548282  -1.167848  3.143859
 N  -1.804118  -0.881724  3.500777
 C  -2.051054  0.298474  4.103144
 N  -1.193215  1.272259  4.412972
 C  0.050161  0.949954  4.041119
 C  0.460943  -0.226666  3.411556
 N  1.815838  -0.231798  3.170221
 C  2.218649  0.933383  3.650910
 N  1.204931  1.681650  4.183961
 H  -3.085938  0.473124  4.368319
 H  3.237059  1.286052  3.638325
 H  1.278869  2.594785  4.603294
 H  -1.036666  -2.988139  2.368064
 H  0.655625  -2.570261  2.267533
30
adenine dimer 104
 N  0.095673  2.588361  0.000000
 C  0.460844  1.288246  0.000000
 N  1.759578  0.972543  0.000000
 C  2.107363  -0.329661  0.000000
 N  1.316357  -1.404115  0.000000
 C  0.027299  -1.048489  0.000000
 C  -0.486565  0.249767  0.000000
 N  -1.862783  0.255430  0.000000
 C  -2.176005  -1.030205  0.000000
 N  -1.085124  -1.855826  0.000000
 H  3.172571  -0.522367  0.000000
 H  -3.181128  -1.419331  0.000000
 H  -1.085122  -2.863359  0.000000
 H  0.807093  3.296715  0.000000
 H  -0.876946  2.835639  0.000000
 N  -0.284070  -2.346152  2.639343
 C  -0.548282  -1.167848  3.243859
 N  -1.804118  -0.881724  3.600777
 C  -2.051054  0.298474  4.203144
 N  -1.193215  1.272259  4.512972
 C  0.050161  0.949954  4.141119
 C  0.460943  -0.226666  3.511556
 N  1.815838  -0.231798  3.270221
 C  2.218649  0.933383  3.750910
 N  1.204931  1.681650  4.283961
 H  -3.085938  0.473124  4.468319
 H  3.237059  1.286052  3.738325
 H  1.278869  2.594785  4.703294
 H  -1.036666  -2.988139  2.468064
 H  0.655625  -2.570261  2.367533
30
adenine dimer 105
 N  0.095673  2.588361  0.000000
 C  0.460844  1.288246  0.000000
 N  1.759578  0.972543  0.000000
 C  2.107363  -0.329661  0.000000
 N  1.316357  -1.404115  0.000000
 C  0.027299  -1.048489  0.000000
 C  -0.486565  0.249767  0.000000
 N  -1.862783  0.255430  0.000000
 C  -2.176005  -1.030205  0.000000
 N  -1.085124  -1.855826  0.000000
 H  3.172571  -0.522367  0.000000
 H  -3.181128  -1.419331  0.000000
 H  -1.085122  -2.863359  0.000000
 H  0.807093  3.296715  0.000000
 H  -0.876946  2.835639  0.000000
 N  -0.284070  -2.346152  2.739343
 C  -0.548282  -1.167848  3.343859
 N  -1.804118  -0.881724  3.700777
 C  -2.051054  0.298474  4.303144
 N  -1.193215  1.272259  4.612972
 C  0.050161  0.949954  4.241119
 C  0.460943  -0.226666  3.611556
 N  1.815838  -0.231798  3.370221
 C  2.218649  0.933383  3.850909
 N  1.204931  1.681650  4.383961
 H  -3.085938  0.473124  4.568319
 H  3.237059  1.286052  3.838325
 H  1.278869  2.594785  4.803294
 H  -1.036666  -2.988139  2.568064
 H  0.655625  -2.570261  2.467533
30
adenine dimer 106
 N  0.095673  2.588361  0.000000
 C  0.460844  1.288246  0.000000
 N  1.759578  0.972543  0.000000
 C  2.107363  -0.329661  0.000000
 N  1.316357  -1.404115  0.000000
 C  0.027299  -1.048489  0.000000
 C  -0.486565  0.249767  0.000000
 N  -1.862783  0.255430  0.000000
 C  -2.176005  -1.030205  0.000000
 N  -1.085124  -1.855826  0.000000
 H  3.172571  -0.522367  0.000000
 H  -3.181128  -1.419331  0.000000
 H  -1.085122  -2.863359  0.000000
 H  0.807093  3.296715  0.000000
 H  -0.876946  2.835639  0.000000
 N  -0.284070  -2.346152  2.839343
 C  -0.548282  -1.167848  3.443859
 N  -1.804118  -0.881724  3.800777
 C  -2.051054  0.298474  4.403144
 N  -1.193215  1.272259  4.712972
 C  0.050161  0.949954  4.341119
 C  0.460943  -0.226666  3.711556
 N  1.815838  -0.231798  3.470221
 C  2.218649  0.933383  3.950909
 N  1.204931  1.681650  4.483961
 H  -3.085938  0.473124  4.668319
 H  3.237059  1.286052  3.938325
 H  1.278869  2.594785  4.903294
 H  -1.036666  -2.988139  2.668064
 H  0.655625  -2.570261  2.567533
30
adenine dimer 107
 N  0.095673  2.588361  0.000000
 C  0.460844  1.288246  0.000000
 N  1.759578  0.972543  0.000000
 C  2.107363  -0.329661  0.000000
 N  1.316357  -1.404115  0.000000
 C  0.027299  -1.048489  0.000000
 C  -0.486565  0.249767  0.000000
 N  -1.862783  0.255430  0.000000
 C  -2.176005  -1.030205  0.000000
 N  -1.085124  -1.855826  0.000000
 H  3.172571  -0.522367  0.000000
 H  -3.181128  -1.419331  0.000000
 H  -1.085122  -2.863359  0.000000
 H  0.807093  3.296715  0.000000
 H  -0.876946  2.835639  0.000000
 N  -0.284070  -2.346152  2.939343
 C  -0.548282  -1.167848  3.543859
 N  -1.804118  -0.881724  3.900777
 C  -2.051054  0.298474  4.503144
 N  -1.193215  1.272259  4.812972
 C  0.050161  0.949954  4.441119
 C  0.460943  -0.226666  3.811556
 N  1.815838  -0.231798  3.570221
 C  2.218649  0.933383  4.050909
 N  1.204931  1.681650  4.583961
 H  -3.085938  0.473124  4.768319
 H  3.237059  1.286052  4.038325
 H  1.278869  2.594785  5.003294
 H  -1.036666  -2.988139  2.768064
 H  0.655625  -2.570261  2.667533
30
adenine dimer 108
 N  0.095673  2.588361  0.000000
 C  0.460844  1.288246  0.000000
 N  1.759578  0.972543  0.000000
 C  2.107363  -0.329661  0.000000
 N  1.316357  -1.404115  0.000000
 C  0.027299  -1.048489  0.000000
 C  -0.486565  0.249767  0.000000
 N  -1.862783  0.255430  0.000000
 C  -2.176005  -1.030205  0.000000
 N  -1.085124  -1.855826  0.000000
 H  3.172571  -0.522367  0.000000
 H  -3.181128  -1.419331  0.000000
 H  -1.085122  -2.863359  0.000000
 H  0.807093  3.296715  0.000000
 H  -0.876946  2.835639  0.000000
 N  -0.284070  -2.346152  3.039343
 C  -0.548282  -1.167848  3.643859
 N  -1.804118  -0.881724  4.000777
 C  -2.051054  0.298474  4.603144
 N  -1.193215  1.272259  4.912972
 C  0.050161  0.949954  4.541119
 C  0.460943  -0.226666  3.911556
 N  1.815838  -0.231798  3.670221
 C  2.218649  0.933383  4.150909
 N  1.204931  1.681650  4.683960
 H  -3.085938  0.473124  4.868319
 H  3.237059  1.286052  4.138325
 H  1.278869  2.594785  5.103294
 H  -1.036666  -2.988139  2.868064
 H  0.655625  -2.570261  2.767533
30
adenine dimer 109
 N  0.095673  2.588361  0.000000
 C  0.460844  1.288246  0.000000
 N  1.759578  0.972543  0.000000
 C  2.107363  -0.329661  0.000000
 N  1.316357  -1.404115  0.000000
 C  0.027299  -1.048489  0.000000
 C  -0.486565  0.249767  0.000000
 N  -1.862783  0.255430  0.000000
 C  -2.176005  -1.030205  0.000000
 N  -1.085124  -1.855826  0.000000
 H  3.172571  -0.522367  0.000000
 H  -3.181128  -1.419331  0.000000
 H  -1.085122  -2.863359  0.000000
 H  0.807093  3.296715  0.000000
 H  -0.876946  2.835639  0.000000
 N  -0.284070  -2.346152  3.139343
 C  -0.548282  -1.167848  3.743859
 N  -1.804118  -0.881724  4.100777
 C  -2.051054  0.298474  4.703144
 N  -1.193215  1.272259  5.012972
 C  0.050161  0.949954  4.641119
 C  0.460943  -0.226666  4.011556
 N  1.815838  -0.231798  3.770221
 C  2.218649  0.933383  4.250909
 N  1.204931  1.681650  4.783960
 H  -3.085938  0.473124  4.968318
 H  3.237059  1.286052  4.238325
 H  1.278869  2.594785  5.203294
 H  -1.036666  -2.988139  2.968064
 H  0.655625  -2.570261  2.867533
30
adenine dimer 110
 N  0.095673  2.588361  0.000000
 C  0.460844  1.288246  0.000000
 N  1.759578  0.972543  0.000000
 C  2.107363  -0.329661  0.000000
 N  1.316357  -1.404115  0.000000
 C  0.027299  -1.048489  0.000000
 C  -0.486565  0.249767  0.000000
 N  -1.862783  0.255430  0.000000
 C  -2.176005  -1.030205  0.000000
 N  -1.085124  -1.855826  0.000000
 H  3.172571  -0.522367  0.000000
 H  -3.181128  -1.419331  0.000000
 H  -1.085122  -2.863359  0.000000
 H  0.807093  3.296715  0.000000
 H  -0.876946  2.835639  0.000000
 N  -0.284070  -2.346152  3.239343
 C  -0.548282  -1.167848  3.843859
 N  -1.804118  -0.881724  4.200777
 C  -2.051054  0.298474  4.803144
 N  -1.193215  1.272259  5.112972
 C  0.050161  0.949954  4.741118
 C  0.460943  -0.226666  4.111556
 N  1.815838  -0.231798  3.870221
 C  2.218649  0.933383  4.350909
 N  1.204931  1.681650  4.883960
 H  -3.085938  0.473124  5.068318
 H  3.237059  1.286052  4.338325
 H  1.278869  2.594785  5.303294
 H  -1.036666  -2.988139  3.068064
 H  0.655625  -2.570261  2.967533
30
adenine dimer 111
 N  0.095673  2.588361  0.000000
 C  0.460844  1.288246  0.000000
 N  1.759578  0.972543  0.000000
 C  2.107363  -0.329661  0.000000
 N  1.316357  -1.404115  0.000000
 C  0.027299  -1.048489  0.000000
 C  -0.486565  0.249767  0.000000
 N  -1.862783  0.255430  0.000000
 C  -2.176005  -1.030205  0.000000
 N  -1.085124  -1.855826  0.000000
 H  3.172571  -0.522367  0.000000
 H  -3.181128  -1.419331  0.000000
 H  -1.085122  -2.863359  0.000000
 H  0.807093  3.296715  0.000000
 H  -0.876946  2.835639  0.000000
 N  -0.284070  -2.346152  3.339343
 C  -0.548282  -1.167848  3.943859
 N  -1.804118  -0.881724  4.300776
 C  -2.051054  0.298474  4.903143
 N  -1.193215  1.272259  5.212972
 C  0.050161  0.949954  4.841118
 C  0.460943  -0.226666  4.211555
 N  1.815838  -0.231798  3.970221
 C  2.218649  0.933383  4.450909
 N  1.204931  1.681650  4.983960
 H  -3.085938  0.473124  5.168318
 H  3.237059  1.286052  4.438324
 H  1.278869  2.594785  5.403294
 H  -1.036666  -2.988139  3.168064
 H  0.655625  -2.570261  3.067533
30
adenine dimer 112
 N  0.095673  2.588361  0.000000
 C  0.460844  1.288246  0.000000
 N  1.759578  0.972543  0.000000
 C  2.107363  -0.329661  0.000000
 N  1.316357  -1.404115  0.000000
 C  0.027299  -1.048489  0.000000
 C  -0.486565  0.249767  0.000000
 N  -1.862783  0.255430  0.000000
 C  -2.176005  -1.030205  0.000000
 N  -1.085124  -1.855826  0.000000
 H  3.172571  -0.522367  0.000000
 H  -3.181128  -1.419331  0.000000
 H  -1.085122  -2.863359  0.000000
 H  0.807093  3.296715  0.000000
 H  -0.876946  2.835639  0.000000
 N  -0.284070  -0.346152  2.539343
 C  -0.548282  0.832152  3.143859
 N  -1.804118  1.118276  3.500777
 C  -2.051054  2.298474  4.103144
 N  -1.193215  3.272259  4.412972
 C  0.050161  2.949954  4.041119
 C  0.460943  1.773334  3.411556
 N  1.815838  1.768202  3.170221
 C  2.218649  2.933383  3.650910
 N  1.204931  3.681650  4.183961
 H  -3.085938  2.473124  4.368319
 H  3.237059  3.286052  3.638325
 H  1.278869  4.594785  4.603294
 H  -1.036666  -0.988139  2.368064
 H  0.655625  -0.570261  2.267533
30
adenine dimer 113
 N  0.095673  2.588361  0.000000
 C  0.460844  1.288246  0.000000
 N  1.759578  0.972543  0.000000
 C  2.107363  -0.329661  0.000000
 N  1.316357  -1.404115  0.000000
 C  0.027299  -1.048489  0.000000
 C  -0.486565  0.249767  0.000000
 N  -1.862783  0.255430  0.000000
 C  -2.176005  -1.030205  0.000000
 N  -1.085124  -1.855826  0.000000
 H  3.172571  -0.522367  0.000000
 H  -3.181128  -1.419331  0.000000
 H  -1.085122  -2.863359  0.000000
 H  0.807093  3.296715  0.000000
 H  -0.876946  2.835639  0.000000
 N  -0.284070  -0.346152  2.639343
 C  -0.548282  0.832152  3.243859
 N  -1.804118  1.118276  3.600777
 C  -2.051054  2.298474  4.203144
 N  -1.193215  3.272259  4.512972
 C  0.050161  2.949954  4.141119
 C  0.460943  1.773334  3.511556
 N  1.815838  1.768202  3.270221
 C  2.218649  2.933383  3.750910
 N  1.204931  3.681650  4.283961
 H  -3.085938  2.473124  4.468319
 H  3.237059  3.286052  3.738325
 H  1.278869  4.594785  4.703294
 H  -1.036666  -0.988139  2.468064
 H  0.655625  -0.570261  2.367533
30
adenine dimer 114
 N  0.095673  2.588361  0.000000
 C  0.460844  1.288246  0.000000
 N  1.759578  0.972543  0.000000
 C  2.107363  -0.329661  0.000000
 N  1.316357  -1.404115  0.000000
 C  0.027299  -1.048489  0.000000
 C  -0.486565  0.249767  0.000000
 N  -1.862783  0.255430  0.000000
 C  -2.176005  -1.030205  0.000000
 N  -1.085124  -1.855826  0.000000
 H  3.172571  -0.522367  0.000000
 H  -3.181128  -1.419331  0.000000
 H  -1.085122  -2.863359  0.000000
 H  0.807093  3.296715  0.000000
 H  -0.876946  2.835639  0.000000
 N  -0.284070  -0.346152  2.739343
 C  -0.548282  0.832152  3.343859
 N  -1.804118  1.118276  3.700777
 C  -2.051054  2.298474  4.303144
 N  -1.193215  3.272259  4.612972
 C  0.050161  2.949954  4.241119
 C  0.460943  1.773334  3.611556
 N  1.815838  1.768202  3.370221
 C  2.218649  2.933383  3.850909
 N  1.204931  3.681650  4.383961
 H  -3.085938  2.473124  4.568319
 H  3.237059  3.286052  3.838325
 H  1.278869  4.594785  4.803294
 H  -1.036666  -0.988139  2.568064
 H  0.655625  -0.570261  2.467533
30
adenine dimer 115
 N  0.095673  2.588361  0.000000
 C  0.460844  1.288246  0.000000
 N  1.759578  0.972543  0.000000
 C  2.107363  -0.329661  0.000000
 N  1.316357  -1.404115  0.000000
 C  0.027299  -1.048489  0.000000
 C  -0.486565  0.249767  0.000000
 N  -1.862783  0.255430  0.000000
 C  -2.176005  -1.030205  0.000000
 N  -1.085124  -1.855826  0.000000
 H  3.172571  -0.522367  0.000000
 H  -3.181128  -1.419331  0.000000
 H  -1.085122  -2.863359  0.000000
 H  0.807093  3.296715  0.000000
 H  -0.876946  2.835639  0.000000
 N  -0.284070  -0.346152  2.839343
 C  -0.548282  0.832152  3.443859
 N  -1.804118  1.118276  3.800777
 C  -2.051054  2.298474  4.403144
 N  -1.193215  3.272259  4.712972
 C  0.050161  2.949954  4.341119
 C  0.460943  1.773334  3.711556
 N  1.815838  1.768202  3.470221
 C  2.218649  2.933383  3.950909
 N  1.204931  3.681650  4.483961
 H  -3.085938  2.473124  4.668319
 H  3.237059  3.286052  3.938325
 H  1.278869  4.594785  4.903294
 H  -1.036666  -0.988139  2.668064
 H  0.655625  -0.570261  2.567533
30
adenine dimer 116
 N  0.095673  2.588361  0.000000
 C  0.460844  1.288246  0.000000
 N  1.759578  0.972543  0.000000
 C  2.107363  -0.329661  0.000000
 N  1.316357  -1.404115  0.000000
 C  0.027299  -1.048489  0.000000
 C  -0.486565  0.249767  0.000000
 N  -1.862783  0.255430  0.000000
 C  -2.176005  -1.030205  0.000000
 N  -1.085124  -1.855826  0.000000
 H  3.172571  -0.522367  0.000000
 H  -3.181128  -1.419331  0.000000
 H  -1.085122  -2.863359  0.000000
 H  0.807093  3.296715  0.000000
 H  -0.876946  2.835639  0.000000
 N  -0.284070  -0.346152  2.939343
 C  -0.548282  0.832152  3.543859
 N  -1.804118  1.118276  3.900777
 C  -2.051054  2.298474  4.503144
 N  -1.193215  3.272259  4.812972
 C  0.050161  2.949954  4.441119
 C  0.460943  1.773334  3.811556
 N  1.815838  1.768202  3.570221
 C  2.218649  2.933383  4.050909
 N  1.204931  3.681650  4.583961
 H  -3.085938  2.473124  4.768319
 H  3.237059  3.286052  4.038325
 H  1.278869  4.594785  5.003294
 H  -1.036666  -0.988139  2.768064
 H  0.655625  -0.570261  2.667533
30
adenine dimer 117
 N  0.095673  2.588361  0.000000
 C  0.460844  1.288246  0.000000
 N  1.759578  0.972543  0.000000
 C  2.107363  -0.329661  0.000000
 N  1.316357  -1.404115  0.000000
 C  0.027299  -1.048489  0.000000
 C  -0.486565  0.249767  0.000000
 N  -1.862783  0.255430  0.000000
 C  -2.176005  -1.030205  0.000000
 N  -1.085124  -1.855826  0.000000
 H  3.172571  -0.522367  0.000000
 H  -3.181128  -1.419331  0.000000
 H  -1.085122  -2.863359  0.000000
 H  0.807093  3.296715  0.000000
 H  -0.876946  2.835639  0.000000
 N  -0.284070  -0.346152  3.039343
 C  -0.548282  0.832152  3.643859
 N  -1.804118  1.118276  4.000777
 C  -2.051054  2.298474  4.603144
 N  -1.193215  3.272259  4.912972
 C  0.050161  2.949954  4.541119
 C  0.460943  1.773334  3.911556
 N  1.815838  1.768202  3.670221
 C  2.218649  2.933383  4.150909
 N  1.204931  3.681650  4.683960
 H  -3.085938  2.473124  4.868319
 H  3.237059  3.286052  4.138325
 H  1.278869  4.594785  5.103294
 H  -1.036666  -0.988139  2.868064
 H  0.655625  -0.570261  2.767533
30
adenine dimer 118
 N  0.095673  2.588361  0.000000
 C  0.460844  1.288246  0.000000
 N  1.759578  0.972543  0.000000
 C  2.107363  -0.329661  0.000000
 N  1.316357  -1.404115  0.000000
 C  0.027299  -1.048489  0.000000
 C  -0.486565  0.249767  0.000000
 N  -1.862783  0.255430  0.000000
 C  -2.176005  -1.030205  0.000000
 N  -1.085124  -1.855826  0.000000
 H  3.172571  -0.522367  0.000000
 H  -3.181128  -1.419331  0.000000
 H  -1.085122  -2.863359  0.000000
 H  0.807093  3.296715  0.000000
 H  -0.876946  2.835639  0.000000
 N  -0.284070  -0.346152  3.139343
 C  -0.548282  0.832152  3.743859
 N  -1.804118  1.118276  4.100777
 C  -2.051054  2.298474  4.703144
 N  -1.193215  3.272259  5.012972
 C  0.050161  2.949954  4.641119
 C  0.460943  1.773334  4.011556
 N  1.815838  1.768202  3.770221
 C  2.218649  2.933383  4.250909
 N  1.204931  3.681650  4.783960
 H  -3.085938  2.473124  4.968318
 H  3.237059  3.286052  4.238325
 H  1.278869  4.594785  5.203294
 H  -1.036666  -0.988139  2.968064
 H  0.655625  -0.570261  2.867533
30
adenine dimer 119
 N  0.095673  2.588361  0.000000
 C  0.460844  1.288246  0.000000
 N  1.759578  0.972543  0.000000
 C  2.107363  -0.329661  0.000000
 N  1.316357  -1.404115  0.000000
 C  0.027299  -1.048489  0.000000
 C  -0.486565  0.249767  0.000000
 N  -1.862783  0.255430  0.000000
 C  -2.176005  -1.030205  0.000000
 N  -1.085124  -1.855826  0.000000
 H  3.172571  -0.522367  0.000000
 H  -3.181128  -1.419331  0.000000
 H  -1.085122  -2.863359  0.000000
 H  0.807093  3.296715  0.000000
 H  -0.876946  2.835639  0.000000
 N  -0.284070  -0.346152  3.239343
 C  -0.548282  0.832152  3.843859
 N  -1.804118  1.118276  4.200777
 C  -2.051054  2.298474  4.803144
 N  -1.193215  3.272259  5.112972
 C  0.050161  2.949954  4.741118
 C  0.460943  1.773334  4.111556
 N  1.815838  1.768202  3.870221
 C  2.218649  2.933383  4.350909
 N  1.204931  3.681650  4.883960
 H  -3.085938  2.473124  5.068318
 H  3.237059  3.286052  4.338325
 H  1.278869  4.594785  5.303294
 H  -1.036666  -0.988139  3.068064
 H  0.655625  -0.570261  2.967533
30
adenine dimer 120
 N  0.095673  2.588361  0.000000
 C  0.460844  1.288246  0.000000
 N  1.759578  0.972543  0.000000
 C  2.107363  -0.329661  0.000000
 N  1.316357  -1.404115  0.000000
 C  0.027299  -1.048489  0.000000
 C  -0.486565  0.249767  0.000000
 N  -1.862783  0.255430  0.000000
 C  -2.176005  -1.030205  0.000000
 N  -1.085124  -1.855826  0.000000
 H  3.172571  -0.522367  0.000000
 H  -3.181128  -1.419331  0.000000
 H  -1.085122  -2.863359  0.000000
 H  0.807093  3.296715  0.000000
 H  -0.876946  2.835639  0.000000
 N  -0.284070  -0.346152  3.339343
 C  -0.548282  0.832152  3.943859
 N  -1.804118  1.118276  4.300776
 C  -2.051054  2.298474  4.903143
 N  -1.193215  3.272259  5.212972
 C  0.050161  2.949954  4.841118
 C  0.460943  1.773334  4.211555
 N  1.815838  1.768202  3.970221
 C  2.218649  2.933383  4.450909
 N  1.204931  3.681650  4.983960
 H  -3.085938  2.473124  5.168318
 H  3.237059  3.286052  4.438324
 H  1.278869  4.594785  5.403294
 H  -1.036666  -0.988139  3.168064
 H  0.655625  -0.570261  3.067533
30
adenine dimer 121
 N  0.095673  2.588361  0.000000
 C  0.460844  1.288246  0.000000
 N  1.759578  0.972543  0.000000
 C  2.107363  -0.329661  0.000000
 N  1.316357  -1.404115  0.000000
 C  0.027299  -1.048489  0.000000
 C  -0.486565  0.249767  0.000000
 N  -1.862783  0.255430  0.000000
 C  -2.176005  -1.030205  0.000000
 N  -1.085124  -1.855826  0.000000
 H  3.172571  -0.522367  0.000000
 H  -3.181128  -1.419331  0.000000
 H  -1.085122  -2.863359  0.000000
 H  0.807093  3.296715  0.000000
 H  -0.876946  2.835639  0.000000
 N  -0.284070  -0.346152  3.439342
 C  -0.548282  0.832152  4.043859
 N  -1.804118  1.118276  4.400776
 C  -2.051054  2.298474  5.003143
 N  -1.193215  3.272259  5.312972
 C  0.050161  2.949954  4.941118
 C  0.460943  1.773334  4.311555
 N  1.815838  1.768202  4.070220
 C  2.218649  2.933383  4.550909
 N  1.204931  3.681650  5.083960
 H  -3.085938  2.473124  5.268318
 H  3.237059  3.286052  4.538324
 H  1.278869  4.594785  5.503294
 H  -1.036666  -0.988139  3.268064
 H  0.655625  -0.570261  3.167532
30
adenine dimer 122
 N  0.095673  2.588361  0.000000
 C  0.460844  1.288246  0.000000
 N  1.759578  0.972543  0.000000
 C  2.107363  -0.329661  0.000000
 N  1.316357  -1.404115  0.000000
 C  0.027299  -1.048489  0.000000
 C  -0.486565  0.249767  0.000000
 N  -1.862783  0.255430  0.000000
 C  -2.176005  -1.030205  0.000000
 N  -1.085124  -1.855826  0.000000
 H  3.172571  -0.522367  0.000000
 H  -3.181128  -1.419331  0.000000
 H  -1.085122  -2.863359  0.000000
 H  0.807093  3.296715  0.000000
 H  -0.876946  2.835639  0.000000
 N  1.215930  -0.346152  2.539343
 C  0.951718  0.832152  3.143859
 N  -0.304118  1.118276  3.500777
 C  -0.551054  2.298474  4.103144
 N  0.306785  3.272259  4.412972
 C  1.550161  2.949954  4.041119
 C  1.960943  1.773334  3.411556
 N  3.315838  1.768202  3.170221
 C  3.718649  2.933383  3.650910
 N  2.704931  3.681650  4.183961
 H  -1.585938  2.473124  4.368319
 H  4.737059  3.286052  3.638325
 H  2.778869  4.594785  4.603294
 H  0.463334  -0.988139  2.368064
 H  2.155625  -0.570261  2.267533
30
adenine dimer 123
 N  0.095673  2.588361  0.000000
 C  0.460844  1.288246  0.000000
 N  1.759578  0.972543  0.000000
 C  2.107363  -0.329661  0.000000
 N  1.316357  -1.404115  0.000000
 C  0.027299  -1.048489  0.000000
 C  -0.486565  0.249767  0.000000
 N  -1.862783  0.255430  0.000000
 C  -2.176005  -1.030205  0.000000
 N  -1.085124  -1.855826  0.000000
 H  3.172571  -0.522367  0.000000
 H  -3.181128  -1.419331  0.000000
 H  -1.085122  -2.863359  0.000000
 H  0.807093  3.296715  0.000000
 H  -0.876946  2.835639  0.000000
 N  1.215930  -0.346152  2.639343
 C  0.951718  0.832152  3.243859
 N  -0.304118  1.118276  3.600777
 C  -0.551054  2.298474  4.203144
 N  0.306785  3.272259  4.512972
 C  1.550161  2.949954  4.141119
 C  1.960943  1.773334  3.511556
 N  3.315838  1.768202  3.270221
 C  3.718649  2.933383  3.750910
 N  2.704931  3.681650  4.283961
 H  -1.585938  2.473124  4.468319
 H  4.737059  3.286052  3.738325
 H  2.778869  4.594785  4.703294
 H  0.463334  -0.988139  2.468064
 H  2.155625  -0.570261  2.367533
30
adenine dimer 124
 N  0.095673  2.588361  0.000000
 C  0.460844  1.288246  0.000000
 N  1.759578  0.972543  0.000000
 C  2.107363  -0.329661  0.000000
 N  1.316357  -1.404115  0.000000
 C  0.027299  -1.048489  0.000000
 C  -0.486565  0.249767  0.000000
 N  -1.862783  0.255430  0.000000
 C  -2.176005  -1.030205  0.000000
 N  -1.085124  -1.855826  0.000000
 H  3.172571  -0.522367  0.000000
 H  -3.181128  -1.419331  0.000000
 H  -1.085122  -2.863359  0.000000
 H  0.807093  3.296715  0.000000
 H  -0.876946  2.835639  0.000000
 N  1.215930  -0.346152  2.739343
 C  0.951718  0.832152  3.343859
 N  -0.304118  1.118276  3.700777
 C  -0.551054  2.298474  4.303144
 N  0.306785  3.272259  4.612972
 C  1.550161  2.949954  4.241119
 C  1.960943  1.773334  3.611556
 N  3.315838  1.768202  3.370221
 C  3.718649  2.933383  3.850909
 N  2.704931  3.681650  4.383961
 H  -1.585938  2.473124  4.568319
 H  4.737059  3.286052  3.838325
 H  2.778869  4.594785  4.803294
 H  0.463334  -0.988139  2.568064
 H  2.155625  -0.570261  2.467533
30
adenine dimer 125
 N  0.095673  2.588361  0.000000
 C  0.460844  1.288246  0.000000
 N  1.759578  0.972543  0.000000
 C  2.107363  -0.329661  0.000000
 N  1.316357  -1.404115  0.000000
 C  0.027299  -1.048489  0.000000
 C  -0.486565  0.249767  0.000000
 N  -1.862783  0.255430  0.000000
 C  -2.176005  -1.030205  0.000000
 N  -1.085124  -1.855826  0.000000
 H  3.172571  -0.522367  0.000000
 H  -3.181128  -1.419331  0.000000
 H  -1.085122  -2.863359  0.000000
 H  0.807093  3.296715  0.000000
 H  -0.876946  2.835639  0.000000
 N  1.215930  -0.346152  2.839343
 C  0.951718  0.832152  3.443859
 N  -0.304118  1.118276  3.800777
 C  -0.551054  2.298474  4.403144
 N  0.306785  3.272259  4.712972
 C  1.550161  2.949954  4.341119
 C  1.960943  1.773334  3.711556
 N  3.315838  1.768202  3.470221
 C  3.718649  2.933383  3.950909
 N  2.704931  3.681650  4.483961
 H  -1.585938  2.473124  4.668319
 H  4.737059  3.286052  3.938325
 H  2.778869  4.594785  4.903294
 H  0.463334  -0.988139  2.668064
 H  2.155625  -0.570261  2.567533
30
adenine dimer 126
 N  0.095673  2.588361  0.000000
 C  0.460844  1.288246  0.000000
 N  1.759578  0.972543  0.000000
 C  2.107363  -0.329661  0.000000
 N  1.316357  -1.404115  0.000000
 C  0.027299  -1.048489  0.000000
 C  -0.486565  0.249767  0.000000
 N  -1.862783  0.255430  0.000000
 C  -2.176005  -1.030205  0.000000
 N  -1.085124  -1.855826  0.000000
 H  3.172571  -0.522367  0.000000
 H  -3.181128  -1.419331  0.000000
 H  -1.085122  -2.863359  0.000000
 H  0.807093  3.296715  0.000000
 H  -0.876946  2.835639  0.000000
 N  1.215930  -0.346152  2.939343
 C  0.951718  0.832152  3.543859
 N  -0.304118  1.118276  3.900777
 C  -0.551054  2.298474  4.503144
 N  0.306785  3.272259  4.812972
 C  1.550161  2.949954  4.441119
 C  1.960943  1.773334  3.811556
 N  3.315838  1.768202  3.570221
 C  3.718649  2.933383  4.050909
 N  2.704931  3.681650  4.583961
 H  -1.585938  2.473124  4.768319
 H  4.737059  3.286052  4.038325
 H  2.778869  4.594785  5.003294
 H  0.463334  -0.988139  2.768064
 H  2.155625  -0.570261  2.667533
30
adenine dimer 127
 N  0.095673  2.588361  0.000000
 C  0.460844  1.288246  0.000000
 N  1.759578  0.972543  0.000000
 C  2.107363  -0.329661  0.000000
 N  1.316357  -1.404115  0.000000
 C  0.027299  -1.048489  0.000000
 C  -0.486565  0.249767  0.000000
 N  -1.862783  0.255430  0.000000
 C  -2.176005  -1.030205  0.000000
 N  -1.085124  -1.855826  0.000000
 H  3.172571  -0.522367  0.000000
 H  -3.181128  -1.419331  0.000000
 H  -1.085122  -2.863359  0.000000
 H  0.807093  3.296715  0.000000
 H  -0.876946  2.835639  0.000000
 N  1.215930  -0.346152  3.039343
 C  0.951718  0.832152  3.643859
 N  -0.304118  1.118276  4.000777
 C  -0.551054  2.298474  4.603144
 N  0.306785  3.272259  4.912972
 C  1.550161  2.949954  4.541119
 C  1.960943  1.773334  3.911556
 N  3.315838  1.768202  3.670221
 C  3.718649  2.933383  4.150909
 N  2.704931  3.681650  4.683960
 H  -1.585938  2.473124  4.868319
 H  4.737059  3.286052  4.138325
 H  2.778869  4.594785  5.103294
 H  0.463334  -0.988139  2.868064
 H  2.155625  -0.570261  2.767533
30
adenine dimer 128
 N  0.095673  2.588361  0.000000
 C  0.460844  1.288246  0.000000
 N  1.759578  0.972543  0.000000
 C  2.107363  -0.329661  0.000000
 N  1.316357  -1.404115  0.000000
 C  0.027299  -1.048489  0.000000
 C  -0.486565  0.249767  0.000000
 N  -1.862783  0.255430  0.000000
 C  -2.176005  -1.030205  0.000000
 N  -1.085124  -1.855826  0.000000
 H  3.172571  -0.522367  0.000000
 H  -3.181128  -1.419331  0.000000
 H  -1.085122  -2.863359  0.000000
 H  0.807093  3.296715  0.000000
 H  -0.876946  2.835639  0.000000
 N  1.215930  -0.346152  3.139343
 C  0.951718  0.832152  3.743859
 N  -0.304118  1.118276  4.100777
 C  -0.551054  2.298474  4.703144
 N  0.306785  3.272259  5.012972
 C  1.550161  2.949954  4.641119
 C  1.960943  1.773334  4.011556
 N  3.315838  1.768202  3.770221
 C  3.718649  2.933383  4.250909
 N  2.704931  3.681650  4.783960
 H  -1.585938  2.473124  4.968318
 H  4.737059  3.286052  4.238325
 H  2.778869  4.594785  5.203294
 H  0.463334  -0.988139  2.968064
 H  2.155625  -0.570261  2.867533
30
adenine dimer 129
 N  0.095673  2.588361  0.000000
 C  0.460844  1.288246  0.000000
 N  1.759578  0.972543  0.000000
 C  2.107363  -0.329661  0.000000
 N  1.316357  -1.404115  0.000000
 C  0.027299  -1.048489  0.000000
 C  -0.486565  0.249767  0.000000
 N  -1.862783  0.255430  0.000000
 C  -2.176005  -1.030205  0.000000
 N  -1.085124  -1.855826  0.000000
 H  3.172571  -0.522367  0.000000
 H  -3.181128  -1.419331  0.000000
 H  -1.085122  -2.863359  0.000000
 H  0.807093  3.296715  0.000000
 H  -0.876946  2.835639  0.000000
 N  1.215930  -0.346152  3.239343
 C  0.951718  0.832152  3.843859
 N  -0.304118  1.118276  4.200777
 C  -0.551054  2.298474  4.803144
 N  0.306785  3.272259  5.112972
 C  1.550161  2.949954  4.741118
 C  1.960943  1.773334  4.111556
 N  3.315838  1.768202  3.870221
 C  3.718649  2.933383  4.350909
 N  2.704931  3.681650  4.883960
 H  -1.585938  2.473124  5.068318
 H  4.737059  3.286052  4.338325
 H  2.778869  4.594785  5.303294
 H  0.463334  -0.988139  3.068064
 H  2.155625  -0.570261  2.967533
30
adenine dimer 130
 N  0.095673  2.588361  0.000000
 C  0.460844  1.288246  0.000000
 N  1.759578  0.972543  0.000000
 C  2.107363  -0.329661  0.000000
 N  1.316357  -1.404115  0.000000
 C  0.027299  -1.048489  0.000000
 C  -0.486565  0.249767  0.000000
 N  -1.862783  0.255430  0.000000
 C  -2.176005  -1.030205  0.000000
 N  -1.085124  -1.855826  0.000000
 H  3.172571  -0.522367  0.000000
 H  -3.181128  -1.419331  0.000000
 H  -1.085122  -2.863359  0.000000
 H  0.807093  3.296715  0.000000
 H  -0.876946  2.835639  0.000000
 N  1.215930  -0.346152  3.339343
 C  0.951718  0.832152  3.943859
 N  -0.304118  1.118276  4.300776
 C  -0.551054  2.298474  4.903143
 N  0.306785  3.272259  5.212972
 C  1.550161  2.949954  4.841118
 C  1.960943  1.773334  4.211555
 N  3.315838  1.768202  3.970221
 C  3.718649  2.933383  4.450909
 N  2.704931  3.681650  4.983960
 H  -1.585938  2.473124  5.168318
 H  4.737059  3.286052  4.438324
 H  2.778869  4.594785  5.403294
 H  0.463334  -0.988139  3.168064
 H  2.155625  -0.570261  3.067533
30
adenine dimer 131
 N  0.095673  2.588361  0.000000
 C  0.460844  1.288246  0.000000
 N  1.759578  0.972543  0.000000
 C  2.107363  -0.329661  0.000000
 N  1.316357  -1.404115  0.000000
 C  0.027299  -1.048489  0.000000
 C  -0.486565  0.249767  0.000000
 N  -1.862783  0.255430  0.000000
 C  -2.176005  -1.030205  0.000000
 N  -1.085124  -1.855826  0.000000
 H  3.172571  -0.522367  0.000000
 H  -3.181128  -1.419331  0.000000
 H  -1.085122  -2.863359  0.000000
 H  0.807093  3.296715  0.000000
 H  -0.876946  2.835639  0.000000
 N  1.215930  -0.346152  3.439342
 C  0.951718  0.832152  4.043859
 N  -0.304118  1.118276  4.400776
 C  -0.551054  2.298474  5.003143
 N  0.306785  3.272259  5.312972
 C  1.550161  2.949954  4.941118
 C  1.960943  1.773334  4.311555
 N  3.315838  1.768202  4.070220
 C  3.718649  2.933383  4.550909
 N  2.704931  3.681650  5.083960
 H  -1.585938  2.473124  5.268318
 H  4.737059  3.286052  4.538324
 H  2.778869  4.594785  5.503294
 H  0.463334  -0.988139  3.268064
 H  2.155625  -0.570261  3.167532
